## 1 **Cortical ROR $\beta$ is required for layer 4 transcriptional identity and barrel integrity.**

2  
3 Erin A. Clark<sup>1</sup>, Michael Rutlin<sup>3</sup>, Lucia Capano<sup>1</sup>, Samuel Aviles<sup>1</sup>, Jordan R. Saadon<sup>1</sup>, Praveen  
4 Taneja<sup>1</sup>, Qiyu Zhang<sup>1</sup>, James Bullis<sup>1</sup>, Timothy Lauer<sup>1</sup>, Emma Myers<sup>1</sup>, Anton Schulmann<sup>2</sup>,  
5 Douglas Forrest<sup>4</sup>, Sacha Nelson<sup>1</sup>

- 6  
7 1. Department of Biology and Program in Neuroscience, Brandeis University, Waltham,  
8 Massachusetts 02454  
9 2. Janelia Research Campus, Ashburn, Virginia 20147  
10 3. Kintai Therapeutics, Cambridge, MA 02139  
11 4. Laboratory of Endocrinology and Receptor Biology, National Institutes of Health,  
12 NIDDK, Bethesda, MD 20892

### 13 **Abstract**

14  
15 Retinoic Acid-Related Orphan Receptor Beta (ROR $\beta$ ) is a transcription factor (TF) and marker of  
16 layer 4 (L4) neurons, which are distinctive both in transcriptional identity and the ability to form  
17 aggregates such as barrels in rodent somatosensory cortex. However, the relationship between  
18 transcriptional identity and L4 cytoarchitecture is largely unknown. We find ROR $\beta$  is required in  
19 the cortex for L4 aggregation into barrels and thalamocortical afferent (TCA) segregation.  
20 Interestingly, barrel organization also degrades with age. Loss of ROR $\beta$  delays excitatory input  
21 and disrupts gene expression and chromatin accessibility, with downregulation of L4 and  
22 upregulation of L5 genes, suggesting a shift in cellular identity. Expression and binding site  
23 accessibility change for many other TFs, including closure of neurodevelopmental TF binding sites  
24 and increased expression and binding capacity of activity-regulated TFs. Lastly, a putative target  
25 of ROR $\beta$ , *Thsd7a*, is downregulated without ROR $\beta$ , and *Thsd7a* knockout alone disrupts TCA  
26 organization in adult barrels.

### 27 **Introduction**

28  
29 Localization of function is a fundamental principle organizing mammalian brain circuitry.  
30 Structure to function mapping is particularly striking in the sensory input to L4 of the neocortex  
31 (Woolsey and Van der Loos, 1970; Catania and Kaas, 1995). L4 neurons are distinctive in their  
32 propensity to form cellular aggregates, or modules, that receive segregated thalamic inputs and  
33 represent features of the sensory periphery. Whisker barrels in the rodent somatosensory cortex  
34 are a prototypical example, but other somatosensory modules within L4 are also present in the  
35 cortices of insectivores, carnivores and primates (Krubitzer and Seelke, 2012), and columns  
36 receiving segregated input are present in the visual cortices of carnivores and primates, and in  
37 other cortical regions (Mountcastle, 1997). At the same time, gene expression studies in mouse  
38 and human show that L4 neurons also have a distinctive transcriptional identity that includes  
39 expression of ROR $\beta$  (Zeng et al., 2012). Despite these two striking features, little is known about  
40 the relationships between transcriptional identity, the mechanisms that establish and regulate that  
41 identity, and features of L4 cytoarchitecture.

42  
43 Researchers have long used the rodent whisker pathway to study cytoarchitecture development  
44 (Fox, 1992; Yang et al., 2018). The whisker map is organized into microcolumnar units called  
45 barrels located in primary somatosensory cortex (S1). In mice, layer 4 (L4) cortical neurons  
46 assemble into columns that form barrel walls and input is relayed via thalamocortical afferents

47 (TCAs), which cluster in the center of barrel hollows. Each whisker is projected through corollary  
48 maps in the brainstem and ventrobasal thalamus (Van der Loos, 1976) before reaching S1.

49  
50 Many proteins and pathways are required for presynaptic organization of TCAs and/or  
51 postsynaptic organization in L4 (Li and Crair, 2011; Wu et al., 2011; Erzurumlu and Gaspar, 2012).  
52 Much of what we know has focused on the requirement of input activity and intact signaling  
53 pathways. Genetic disruption of synaptic transmission via glutamate (Iwasato et al., 1997; 2000;  
54 Hannan et al., 2001; Datwani et al., 2002; Li et al., 2013; Ballester Rosado et al., 2016), or  
55 serotonin pathways (Cases et al., 1995; Salichon et al., 2001) perturb some aspect of barrel  
56 organization. Several related signal transduction pathways are also required (Abdel-Majid et al.,  
57 1998; Barnett et al., 2006; Inan et al., 2006; Watson et al., 2006; Lush et al., 2008).

58  
59 Barrel formation is also regulated transcriptionally. Transcription factors (TFs) such as  
60 Bhlhe22/Bhlhb5 and Eomes are involved in the early stages of cortical arealization and barrel  
61 development (Joshi et al., 2008; Elsen et al., 2013). Downstream of these early developmental  
62 processes activity-dependent TFs, including Lmo4, NeuroD2, and Btbd3 regulate aspects of barrel  
63 organization in response to TCA inputs (Ince-Dunn et al., 2006; Kashani et al., 2006; Huang et al.,  
64 2009; Matsui et al., 2013; Wang et al., 2017). In addition, the TFs retinoic acid-related orphan  
65 receptor alpha (ROR $\alpha$ ) and beta (ROR $\beta$ ), are also implicated in barrel formation. ROR $\alpha$  and ROR $\beta$   
66 are expressed in regions of the somatosensory barrel map, with ROR $\alpha$  expressed in brainstem,  
67 thalamus and cortex, and ROR $\beta$  in thalamus and cortex (Nakagawa and O'Leary, 2003). Recently,  
68 ROR $\alpha$  was shown to be required in the thalamus and cortex for proper TCA segregation and barrel  
69 wall formation (Vitalis et al., 2017). Mis-expression of ROR $\beta$  in neocortex is sufficient to drive  
70 cortical neuron clustering and TCA recruitment to ectopic barrel-like structures (Jabaudon et al.,  
71 2012). Together these studies have identified multiple TFs with major roles in early barrel  
72 development that likely set the stage for more downstream terminal differentiation TFs and  
73 activity-regulated TFs to hone the network. Early cortical development, TCA pathfinding, and  
74 activity dependent gene regulation are prolific areas of research. However, the later stages of  
75 neuronal specification and the molecular mechanisms of TFs involved in barrel development are  
76 currently underexplored. TFs such as Bhlh5 and Eomes have broad roles and are widely expressed  
77 in the cortex while the more narrowly expressed TFs such as Btbd3 are downstream of activity  
78 input leaving a gap in our understanding of the intermediate steps that connect cortical  
79 development to activity driven processes. Given the restricted layer specific expression of ROR $\beta$   
80 and its upregulation concomitant with the final stages of barrel formation and the onset activity  
81 input, we hypothesized it would be a good candidate to study transcriptional mechanisms  
82 connecting cellular specification in L4 with cytoarchitecture and network development.

83  
84 We show that in addition to being sufficient, ROR $\beta$  is also required for both pre- and postsynaptic  
85 barrel organization. Without ROR $\beta$  in the cortex, L4 neurons fail to migrate tangentially and  
86 organize into barrel wall structures. This also reduced TCA segregation shortly after barrel  
87 formation would have normally occurred. Interestingly, TCA segregation also declined as animals  
88 aged. Without ROR $\beta$ , L4 gene expression and chromatin accessibility were disrupted, with L4-  
89 specific genes downregulated and L5-specific genes upregulated suggesting a shift in terminal  
90 cellular identity. This involved complex changes in the expression and/or chromatin accessibility  
91 at binding motifs for many TFs in addition to ROR $\beta$ , including developmental regulators and  
92 activity-regulated TFs. L4 neurons also received delayed excitatory input, a key step in barrel

93 development. Lastly, we identify a putative direct gene target of ROR $\beta$ , *Thsd7a*, that is  
94 downregulated without ROR $\beta$  and is required for maintained TCA organization in adulthood.  
95 Together these data characterize the role of ROR $\beta$  across multiple levels to connect molecular and  
96 transcriptional mechanisms to cortical organization and place ROR $\beta$  as a key regulator of a  
97 complex developmental transition orchestrating terminal L4 specification and initiating activity  
98 responsiveness.

99

## 100 Results

101 Cortical barrels in mice are complex structures. Cell-sparse barrel hollows are where thalamic  
102 projections are concentrated. Barrel walls are formed by cortical cell aggregates that surround the  
103 thalamocortical afferents (TCAs). Barrel septa consist of the intermediate spaces between barrel  
104 walls (Woolsey and Van der Loos, 1970). To assess the impact of ROR $\beta$  loss on barrel  
105 organization we used two staining methods. Barrel walls were visualized by Nissl staining (Van  
106 der Loos and Woolsey, 1973) and barrel hollows were visualized by vesicular glutamate  
107 transporter 2 (VGLUT2), which is strongly expressed in TCAs (Fremeau et al., 2001; Liguz-  
108 Lecznar and Skangiel-Kramska, 2007; Liu et al., 2013). This strategy allowed clear identification  
109 of changes in either structure independently. Cytochrome oxidase (CO) staining was also used in  
110 some conditions, but the presence of CO signal in both barrel walls and TCAs made it less useful.

111

### 112 ROR $\beta$ is required for postnatal barrel wall formation and influences segregation of 113 thalamocortical afferents (TCAs).

114 To begin exploring ROR $\beta$  function in barrel organization, we used a global, constitutive knock-  
115 out (KO), which contains a GFP expression cassette knocked into the *Rorb* locus. *Rorb*<sup>GFP/+</sup> mice  
116 express GFP in ROR $\beta$  expressing cells allowing identification of barrel cortex without significant  
117 disruption to barrel structures or neuronal function (Rice and Van der Loos, 1977). *Rorb*<sup>GFP/+</sup> mice  
118 were used as controls (Ctl), while *Rorb*<sup>GFP/GFP</sup> mice disrupt both copies of *Rorb* to generate a KO.

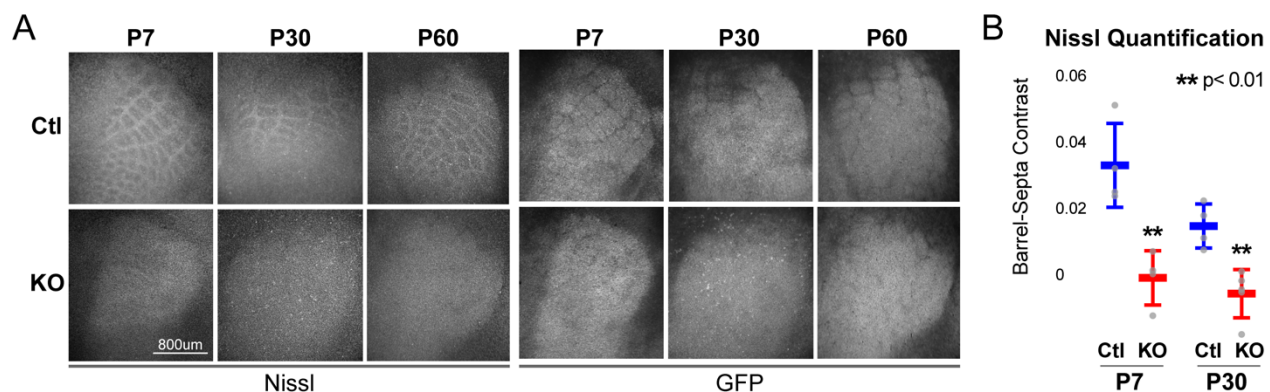

**Figure 1. ROR $\beta$  is required for postnatal barrel wall formation.**

Nissl staining on tangential sections of flattened cortices after global, constitutive knock-out shows barrel wall organization requires ROR $\beta$ .

(A) Top two rows show Nissl staining in whisker barrel field as identified by strong GFP expression (bottom two rows). Control (Ctl) and *Rorb* knock-out (KO) animals were age matched at P7, P30, and P60.

(B) Quantification of barrel hollow to barrel walls/septa contrast (Barrel-Septa Contrast) from Nissl staining. N=4 age-matched animals for each genotype (Ctl or KO). Two tissue sections containing the largest portions of whisker barrel field identified by GFP signal were averaged per animal. Whisker plots show the median per animal  $\pm$  standard deviation. Gray points show mean contrast for each animal. P-value by independent sample t-test, between Ctl and KO at each timepoint.

119 Controls showed no detectable disruption to barrel organization compared to WT animals  
 120 (compare [Figures 1A, 2A](#) to [Figure 7C](#)).

121  
 122 Barrels form around postnatal day 5 (Oishi et al., 2016a). Nissl staining of barrel walls at P7, P30,  
 123 and P60 showed that ROR $\beta$  is required for barrel wall formation. Representative images  
 124 of Nissl and GFP are shown in [Figure 1A](#)  
 125 where the lack of barrel wall organization is clearly visible at P7 and remains disrupted at  
 126 P30. [Figure 1B](#) quantifies this effect as the  
 127 contrast between barrel hollows and barrel  
 128 wall/septa fluorescence intensity. Contrast  
 129 was calculated as (barrel - septa) / (barrel +  
 130 septa) where septa includes barrel walls (see  
 131 methods for details). Quantification  
 132 demonstrated a near complete lack of  
 133 contrast in KO barrel cortex supporting a  
 134 lack of cortical organization.

137  
 138 While TCAs have been shown to instruct  
 139 cortical cell organization we hypothesized  
 140 the lack of barrel walls might reciprocally  
 141 affect TCA organization. TCAs visualized by  
 142 VGLUT2 staining showed an intact pattern  
 143 of barrel hollows at P7 in KO animals, [Figure](#)  
 144 [2A](#). However, careful quantification of the  
 145 VGLUT2 contrast between hollows and  
 146 septa showed a significant decrease in the  
 147 KO suggesting loss of ROR $\beta$  and/or the lack  
 148 of barrel walls had a mild but measurable  
 149 effect on TCA segregation. Interestingly, as  
 150 animals aged into adulthood TCA  
 151 segregation also declined in control as well  
 152 as *Rorb* KO animals. Disorganization in the  
 153 *Rorb* KO was characterized by both loss of  
 154 quantifiable VGLUT2 contrast as well as the  
 155 qualitative barrel patterning most obvious at  
 156 P60 between Ctl and KO in [Figure 2A](#). Both  
 157 genotype and age significantly affected  
 158 VGLUT2 contrast (genotype  $p=4.5e-07$  and  
 159 age  $p=2.6e-06$  by two-way ANOVA) but did  
 160 not interact significantly. This suggests that  
 161 while both age and loss of ROR $\beta$   
 162 significantly reduced contrast, loss of ROR $\beta$   
 163 did not significantly change the time course  
 164 of TCA desegregation. Together these data

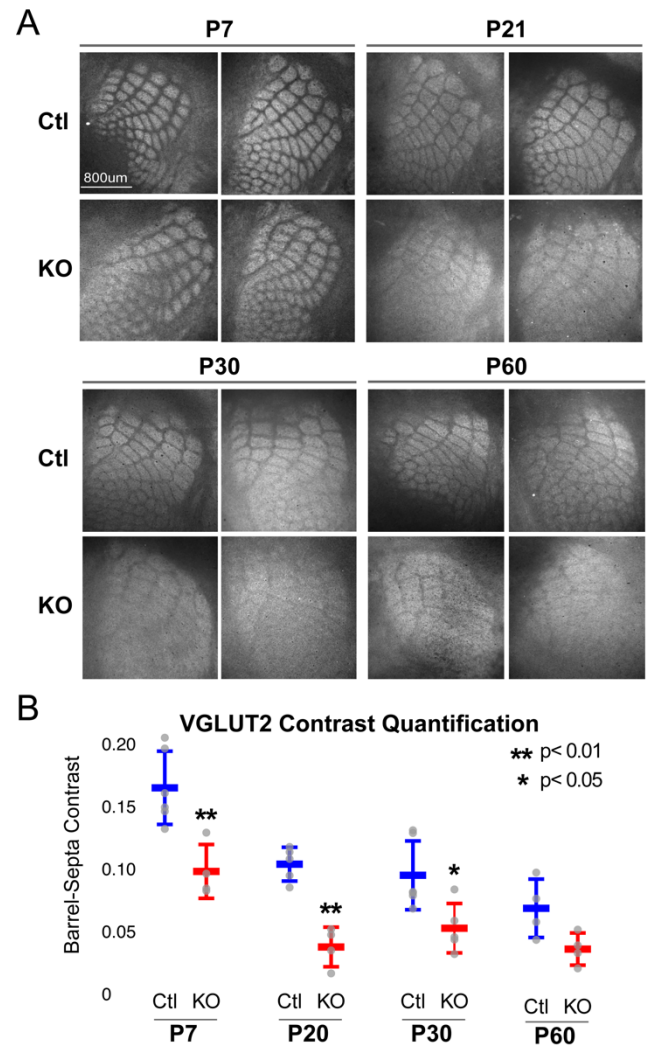

**Figure 2. *Rorb* KO reduces thalamocortical afferent (TCA) segregation.**

(A) VGLUT2 staining of excitatory thalamic axon terminals in cortical whisker barrels shows normal initial TCA patterning at P7 but degradation of barrel-septa contrast in *Rorb* KO adults. Ctl and *Rorb* KO animals were age matched.

(B) Quantification of barrel hollow to barrel walls/septa contrast (Barrel-Septa Contrast) in VGLUT2. N = 4-6 age-matched animals for each genotype (Ctl or KO). Two tissue sections containing the largest portions of whisker barrel field identified by GFP signal were averaged per animal. Whisker plots show median contrast per animal  $\pm$  standard deviation. Gray points show mean contrast for each animal. P-value by independent sample t-test, between Ctl and KO at each timepoint.

165 show that ROR $\beta$  is critical for normal whisker barrel formation and, loss of TCA segregation into  
 166 adulthood suggests time/age affects cytoarchitecture.

167

168 **ROR $\beta$  is required in the cortex but not the thalamus for barrel organization.**

169 In addition to L4 excitatory neurons, ROR $\beta$  is expressed in the thalamic neurons that project to

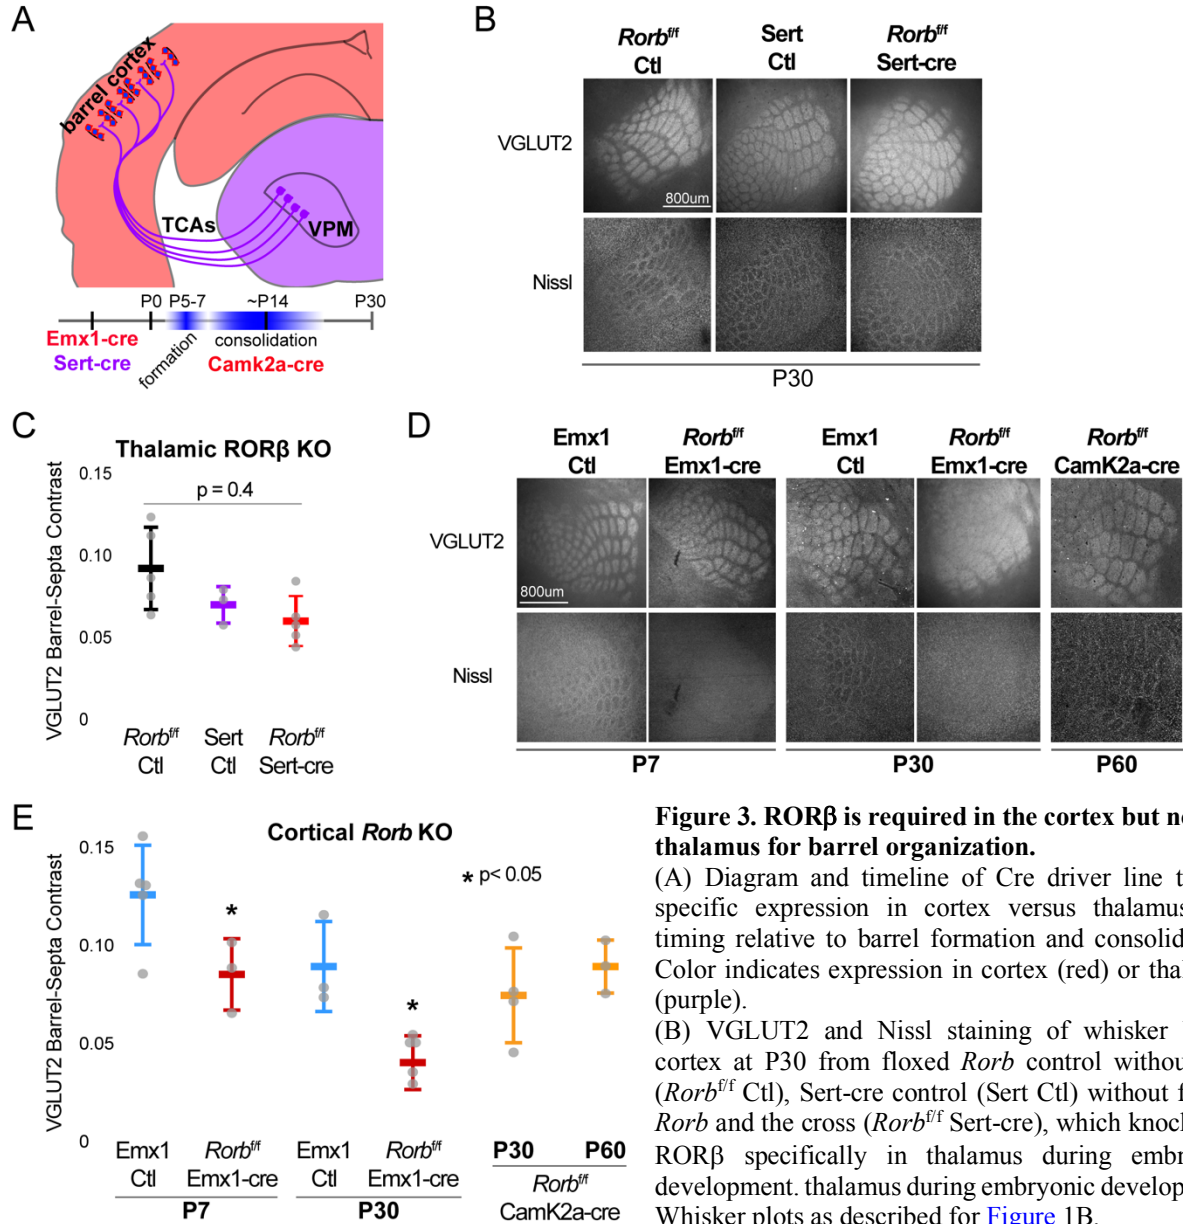

**Figure 3. ROR $\beta$  is required in the cortex but not the thalamus for barrel organization.**

(A) Diagram and timeline of Cre driver line tissue-specific expression in cortex versus thalamus and timing relative to barrel formation and consolidation. Color indicates expression in cortex (red) or thalamus (purple).

(B) VGLUT2 and Nissl staining of whisker barrel cortex at P30 from floxed *Rorb* control without Cre (*Rorb<sup>fl/fl</sup>* Ctl), Sert-cre control (Sert Ctl) without floxed *Rorb* and the cross (*Rorb<sup>fl/fl</sup>* Sert-cre), which knocks out ROR $\beta$  specifically in thalamus during embryonic development. thalamus during embryonic development. Whisker plots as described for [Figure 1B](#).

(C) Quantification of VGLUT2 Barrel-Septa Contrast in genetic lines from B. N=3-5 P30 animals. Quantification and plotting as described in Figure 2B. P-value by ANOVA.

(D) VGLUT2 and Nissl staining of whisker barrel cortex from Emx1-cre control (Emx1-cre Ctl) without floxed *Rorb*, and the cross (*Rorb<sup>fl/fl</sup>* Emx1-cre) from P7 and P30 animals, and a P60 animal from floxed *Rorb* crossed to a CamK2a-cre driver line. Emx1-cre knocks out ROR $\beta$  specifically in forebrain during embryonic development, and CamK2a-cre knocks out ROR $\beta$  in forebrain neurons at postnatal weeks 2-3.

(E) Quantification of VGLUT2 Barrel-Septa Contrast in genetic lines from D. N=3-5 animals per age group. Quantification and plotting as described in Figure 2B. P-values by independent sample t-test, between Emx1 Ctl and KO at each time point. Whisker plots as described for [Figure 1B](#).

170 barrel hollows. To assess whether the disruption of barrels is dependent on ROR $\beta$  expression in  
171 thalamus and/or locally in cortex we used a floxed allele of *Rorb* (*Rorb*<sup>fl/fl</sup>) crossed to Cre-driver  
172 lines generating tissue-specific disruption of ROR $\beta$  as diagrammed in [Figure 3A](#). A knockin line  
173 expressing Cre from the serotonin transporter gene, *Sert* (*Slc6a4* or 5-HTT) locus was used to  
174 knockout *Rorb* in the thalamus. The *Sert-cre* line alone showed a mild disruption to TCA  
175 organization without disrupting barrel walls, suggesting the Cre knockin might be hypomorphic  
176 ([Figure 3B-C](#)). However, thalamic KO of *Rorb* (*Sert-cre*; *Rorb*<sup>fl/fl</sup>) showed no additional disruption  
177 to TCAs or barrel walls. Thus, loss of ROR $\beta$  in thalamic neurons was not responsible for the loss  
178 of cortical wall organization or the majority of TCA disorganization observed in the global  
179 *Rorb*<sup>GFP/GFP</sup> KO.

180  
181 A knock-in line expressing Cre from the *Emx1* locus removed ROR $\beta$  specifically in forebrain  
182 structures. *Emx1-cre* alone showed no significant disruption to barrel organization ([Figure 3D-E](#)).  
183 However, barrel organization was significantly disrupted by cortical KO of *Rorb* (*Emx1-cre*;  
184 *Rorb*<sup>fl/fl</sup>). In addition, a *CamK2a-cre* diver line that removes ROR $\beta$  in the cortex after barrel  
185 formation, showed no effect. Together these data demonstrate that ROR $\beta$  is required in the cortex  
186 prior to barrel formation. Loss of ROR $\beta$  in thalamus or after barrels have formed does not disrupt  
187 barrel architecture, suggesting ROR $\beta$  drives barrel wall organization through cell-intrinsic  
188 mechanisms within layer 4.

189  
190 **ROR $\beta$  is required for expression of a layer 4 gene profile and repression of layer 5 genes.**  
191 Because ROR $\beta$  is a transcription factor we hypothesized loss of function would change gene  
192 expression in L4 neurons. To test this, RNA-seq was performed on sorted GFP<sup>+</sup> cells from micro-  
193 dissected L4 S1. We were careful in this dissection to exclude a small population of GFP<sup>+</sup> L5  
194 neurons. Differential expression analysis between *Rorb*<sup>GFP/+</sup> and *Rorb*<sup>GFP/GFP</sup> cells identified many  
195 dysregulated genes (fold change  $\geq 2$ , adjusted p-value  $< 0.01$ ). At postnatal day 2 (P2) and prior  
196 to barrel formation, 246 genes were significantly disrupted with 51% downregulated in the KO.  
197 At P7, just after barrel formation, 433 genes were disrupted with 36% downregulated. At P30, 286  
198 genes were disrupted with 37% downregulated. Examining the overlap between ages we find very  
199 few genes significantly disrupted in the same direction across time points, suggesting highly  
200 dynamic and complex regulation, [Figure 4-figure supplement A](#).

201  
202 ROR $\beta$  expression is a key feature distinguishing L4 neurons (Lein et al., 2007). To examine the  
203 effect of ROR $\beta$  loss on layer-specific identity we assessed the layer specificity of differentially  
204 expressed genes (DEGs) using the Allen Brain Atlas (Doyle et al., 2008). Genes were considered  
205 layer-specific if the *in-situ* hybridization (ISH) signal appeared at least three-fold higher in one  
206 layer (considering layers 2 and 3 together). Many genes had complex specificities showing  
207 enrichment in two or more layers. These were not included for simplicity. Grouping DEGs based  
208 on their normal layer-specific expression pattern we see overall downregulation of superficial layer  
209 genes with a modest effect on layer 2/3 genes and stronger loss of L4 gene expression in the KO,  
210 [Figure 4A-B](#). In addition, deep layer genes were generally upregulated in the KO with the strongest  
211 effect on layer 5-specific genes. Several L5 genes are worth noting. *Bcl11B/Ctip2*, is a marker of  
212 thick-tufted L5B-type neurons and significantly upregulated at P2 in the KO, but silenced at P7  
213 and P30 similar to control ([Figure 4-figure supplement B](#)). *Fezf2*, another L5B marker and  
214 regulator of *Bcl11B*, was similarly silenced over barrel development, but was mildly overexpressed  
215 at P30 in the KO. *Foxo1*, is mainly expressed in L5 at younger ages (Allen Developing Mouse

216 Brain Atlas) and shows a decline in expression over barrel development but, was significantly  
 217 overexpressed in the KO at P7. *ETV1*, also a L5A marker (Doyle et al., 2008), was upregulated in  
 218 the KO at both P2 and P30. Lastly, *EGR4* was upregulated at P30 in the KO, and has been  
 219 associated with ETV1 expressing neurons (Buenrostro et al., 2015). Together these data support a  
 220 general but disorganized shift in layer identity with many different factors implicated at distinct  
 221 time points.  
 222

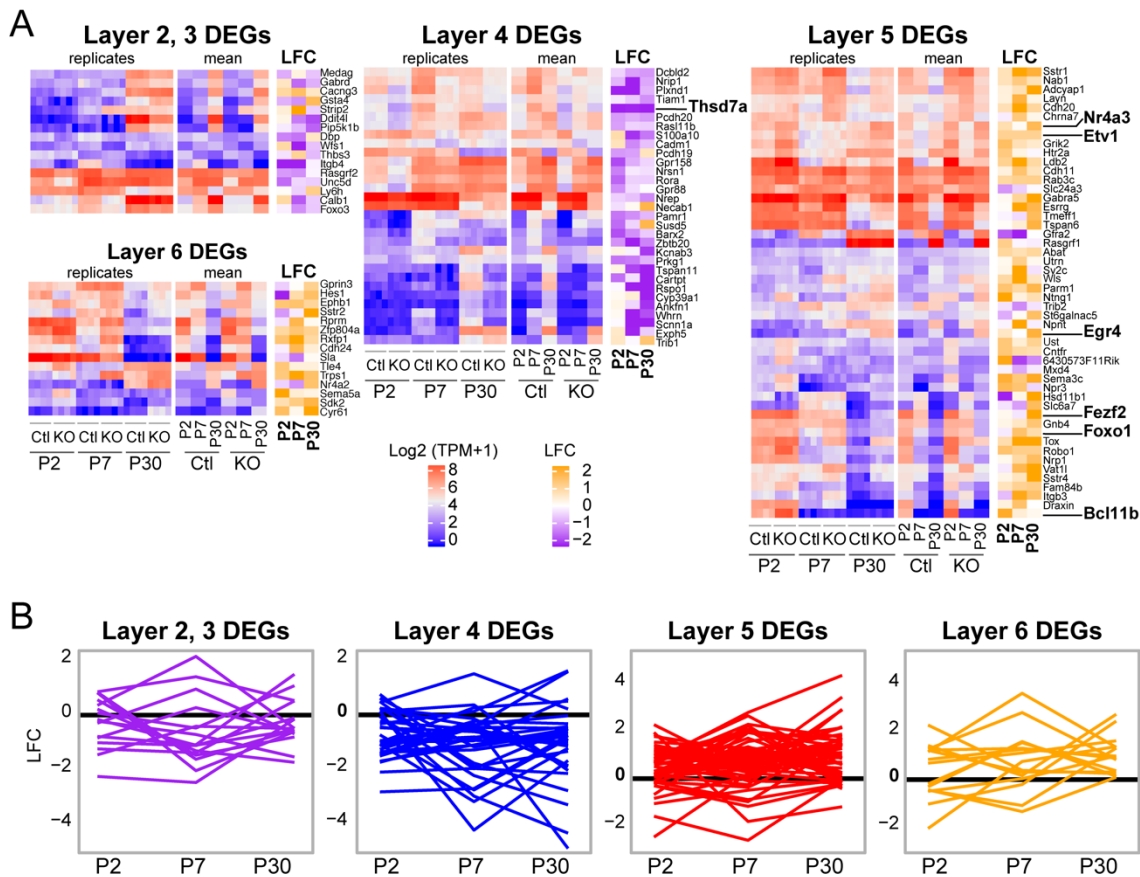

**Figure 4. *Rorb* KO shifts the expression profile of neurons from a layer 4 to layer 5.**

(A) Heatmaps showing marker genes or genes strongly enriched, as identified in the Allen Brain Atlas, for each layer of the neocortex. Log-transformed TPMs are color scaled in red and blue for each of the four RNA-seq replicates in the left most heatmap and the mean for each time point and genotype in the middle heatmaps. Log fold change (LFC) between control (Ctl) and *Rorb* KO is color-scaled in orange and purple in the right most heatmaps.

(B) Line plots showing LFC for same genes. The black line indicates no change. Negative LFC indicated decreased expression in *Rorb* KO, and LFC > 0 indicate increased expression in *Rorb* KO.

### 223 ***Rorb* KO disrupts transcription factor binding sites near DEGs.**

224 ROR $\beta$ , Bcl11b, Foxo1, Etv1, and Egr4 are TFs that often regulate gene expression by binding to  
 225 distal regulatory sites such as enhancers. There are many chromatin features of enhancers, one of  
 226 which is that they are open and accessible to enzymatic digestion in assays such as the Assay for  
 227 Transposase Accessible Chromatin (ATAC) (Chen et al., 2014). To begin examining mechanisms  
 228 involved in changing gene expression, we performed ATAC-seq on sorted GFP<sup>+</sup> L4 neurons from  
 229 control and *Rorb* KO animals at P30 (Figure 5A). High confidence ATAC-seq peaks were assessed

230 for differential accessibility between control and KO samples. We identified 5,210 peaks with  $\geq$   
 231 2-fold change in accessibility (FDR < 0.02). Nearly 4-times as many regions lost accessibility  
 232 (N=4,123 closed) than increased (N=1,087 opened), [Figure 5-figure supplement A](#). Differential  
 233 ATAC peaks were primarily located in introns and intergenic regions ([Figure 5-figure supplement](#)  
 234 B) suggesting loss of ROR $\beta$  function resulted in closure of many more regulatory regions than  
 235 opening.

237 We hypothesized that many of the closed regions might contain a ROR $\beta$  binding motif while  
 238 regions that opened may have binding potential for other TFs. To assess this possibility, two  
 239 software algorithms (MEME and HOMER) were used to identify *de novo* enriched motifs from  
 240 the DNA sequences of differential ATAC peaks separating closed and opened regions. This  
 241 unbiased analysis also identifies which enriched sequences match known TF binding motifs.  
 242 ROR $\beta$  was the top motif from closed regions, [Figure 5-figure supplement C](#). Considering only  
 243 expressed TFs, the potent neurogenic factors NeuroD1 and Ascl1 were also among the top motifs  
 244 in closed regions. In regions that opened, the top motifs from expressed TFs were  
 245 Nfil3, Hlf, Jun, Fos, Trps1, Mef2a/c/d and Irf2. Similar analysis was performed on  
 246 ATAC peaks within 10 kb of up or downregulated DEGs as well as L4 and  
 247 L5.

**Figure 5. *Rorb* KO disrupts transcription factor binding sites near DEGs.**

(A) ATAC-seq normalized reads per million (RPM) for biological replicates. Samples collected from GFP<sup>+</sup> S1 layer IV ROR $\beta$ <sup>gfp/+</sup> neurons (Ctl, blue) and GFP<sup>+</sup> S1 layer IV ROR $\beta$ <sup>gfp/gfp</sup> neurons (KO, red). Arrows indicate differential peaks (fold change  $\geq$  2, FDR<0.02). Open arrows indicate differential peaks with transcription factor motif sequences as in (B).

(B) Cross-validated motifs with significant enrichment in ATAC peaks with differential accessibility. Closed; regions with significantly reduced access, Opened; regions with significantly increased access in the *Rorb* KO. Motif instances were cross-validated between MEME and HOMER algorithms. Odds ratio and p-value calculated comparing to motif frequency in control regions.

(C-D) Cross-validated motif enrichment in ATAC peaks near the TSSs of (C) upregulated or downregulated DEGs and (D) layer 4- or 5-specific genes. Bars plot odds ratio over control regions. Asterisk indicates significant motif enrichment (p<0.03 by Fisher exact test) in nearby ATAC peaks compared to control regions and separately significant enrichment (p<0.03 by Fisher exact test) of DEGs with a nearby motif compared to an independent group of control genes.

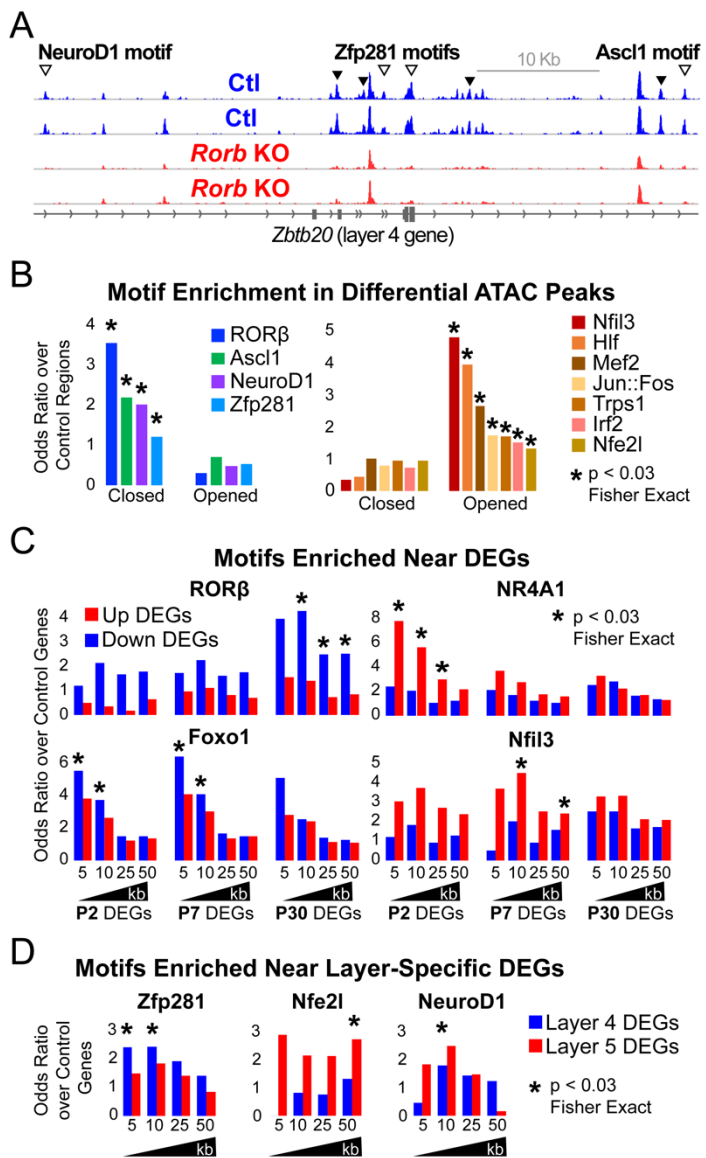



250 L5 DEGs. To confirm enrichment and identify motif locations we used MEME FIMO and  
251 HOMER to scan for instances of a given set of motifs. This was done for all expressed TFs either  
252 enriched in the *de novo* motif analysis or differentially expressed, for which high quality motif  
253 models existed. Motif instances were cross-validated by retaining only those found by both MEME  
254 and HOMER. [Figure 5B](#) plots the odds ratio of motifs significantly enriched compared to control  
255 regions. Many of the motifs found by *de novo* analysis were confirmed, including ROR $\beta$  in regions  
256 that closed.

257  
258 To assess which TFs might play a significant role in up or downregulation of DEGs we varied a  
259 distance window around the transcription start site (TSS) to identify nearby ATAC or control  
260 regions containing a DNA motif. We tested for enrichment of motifs in ATAC regions near DEGs  
261 compared to motifs in control regions. We also tested whether DEGs with a nearby motif were  
262 significantly enriched compared to a control group of genes that did not change expression in the  
263 *Rorb* KO. In essence, we tested whether motifs were enriched around certain DEGs and whether  
264 a significant portion of those DEGs had a nearby motif. To reduce false positives, only motifs with  
265 significant enrichment in both tests are shown in [Figure 5C-D](#).

266  
267 Genes downregulated at P30 showed significant enrichment of nearby ROR $\beta$  motifs suggesting  
268 ROR $\beta$  is important for gene activation ([Figure 5C](#)). Motifs for Nr4a1 and Nfil3 were enriched near  
269 upregulated DEGs at P2 and P7 respectively consistent with an early role for these TFs in  
270 activating expression. Foxo1 motifs were enriched near genes downregulated at P2 and P7.  
271 Consistent with a role in early gene regulation, Foxo1 was highly expressed at P2 and declined  
272 with age in control neurons ([Figure 4-figure supplement B](#)). However, in the KO, Foxo1 remained  
273 significantly elevated at P7 eventually decreasing to levels comparable to control at P30. The close  
274 proximity of Foxo1 binding sites to downregulated genes and its elevated expression at younger  
275 ages suggests it may act as a repressor that is normally silenced just after barrel formation to allow  
276 proper gene induction in L4 neurons. Without ROR $\beta$ , silencing of Foxo1 is delayed allowing it to  
277 aberrantly repress targets at younger ages.

278  
279 Interestingly, we did not find ROR $\beta$  motifs enriched near L4 genes suggesting the shift in layer-  
280 specific gene expression is a downstream effect of ROR $\beta$  loss. While ROR $\beta$  does not appear to  
281 directly regulate layer specific genes, Zfp281 motifs were enriched near L4 genes in the *de novo*  
282 motif search and confirmed by specific mapping ([Figure 5-figure supplement C](#) and [Figure 5D](#)).  
283 Zfp281 was highly expressed in both samples, at all ages, and unchanged by *Rorb* KO ([Figure 5-](#)  
284 [figure supplement D](#)). Zfp281 motifs were also enriched in regions that closed in the *Rorb* KO  
285 suggesting it might be a novel activator of L4-specific genes and dependent on some other factor  
286 to maintain accessible chromatin at its binding sites.

287  
288 Nfe2l and NeuroD1 motifs were enriched near L5 genes. NeuroD1 motifs were also enriched in  
289 regions that closed suggesting it might act as an inhibitor of L5-specific genes as these genes  
290 increased expression when NeuroD1 sites closed. Nfe2l consists of a family of TFs that share a  
291 binding motif. Nfe2l1 was expressed at younger ages and increased in the adult while Nfe2l3 was  
292 highly expressed at P2 and silenced by P7 ([Figure 5-figure supplement D](#)). *Rorb* KO did not  
293 significantly disrupt expression of either, but the motif was enriched in regions that opened  
294 suggesting Nfe2l1 and/or 3 may be novel activators of L5-specific genes.

295

296 The TF motifs enriched near upregulated DEGs were noteworthy for possible relationships with  
297 neuronal activity. Nr4a1 is an activity induced TF that regulates the density and distribution of  
298 excitatory synapses (Mitsui et al., 2001). Nfil3 and Hlf bind and compete for similar DNA motifs  
299 (Beaumont et al., 2012), and may also be involved in activity-regulated transcription. Nfil3 is  
300 upregulated in human brain tissue following seizures (Beaumont et al., 2012), and mutations in  
301 Hlf are linked to spontaneous seizures (Gachon et al., 2004; Hawkins and Kearney, 2016). In  
302 addition, motifs for the classic immediate early genes, Jun and Fos, were enriched in regions that  
303 opened. These observations led us to examine the expression of other activity-regulated TFs. Many  
304 were significantly upregulated at P30 while Lmo4 and its binding partner Lbd2 were upregulated  
305 at P7 (Figure 5-figure supplement E). Lmo4 expression is induced by calcium signaling and is  
306 required for TCA patterning in barrel cortex (Kashani et al., 2006; Huang et al., 2009). Another  
307 activity-regulated TF, Btbd3, which drives L4 neurons to orient their dendrites into barrel hollows,  
308 was significantly downregulated (Figure 5-figure supplement E). Lmo4 and Btbd3 are the only  
309 genes previously shown to disrupt barrels that were also dysregulated in the *Rorb* KO (Figure 5-  
310 figure supplement F). Interestingly, *Lmo4* KO disrupts barrels yet it was upregulated in the *Rorb*  
311 KO indicative that *Rorb* KO disrupts barrels through a divergent mechanism from what has been  
312 previously described.

313  
314 Interestingly, *SI00A10*, is another gene associated with L5A neurons (Schmidt et al., 2012;  
315 Svenningsson et al., 2013), but was downregulated at P7 and P30 (Figure 5-figure supplement G).  
316 The protein product of *SI00A10*, p11, is involved in serotonin signaling via binding to the  
317 serotonin receptors Htr1b, Htr1d, and Htr4 (Warner-Schmidt et al., 2009). Htr1b was the only  
318 serotonin receptor expressed in our samples and was also significantly downregulated at P7 and  
319 P30. These data suggest that in addition to altered layer identity, *Rorb* KO may also disrupt  
320 serotonergic signaling, an important pathway in TCA communication with cortex (Kawasaki,  
321 2015). Together with upregulation of activity-regulated TFs, L4 neurons in the *Rorb* KO likely  
322 have significantly altered responses to activity.

323  
324 These analyses paint a complex picture where gene expression in L4 *Rorb* KO neurons is disrupted  
325 by multiple mechanisms. Loss of ROR $\beta$  results in closure of many ROR $\beta$  binding sites which are  
326 also enriched near genes with reduced expression in adults consistent with an activator role for  
327 ROR $\beta$ . Other regulatory changes involve complex combinations of altered TF expression and/or  
328 altered binding potential at sites that opened or closed in the KO likely due to downstream effects  
329 of ROR $\beta$  loss. These changes impact both known neurodevelopmental regulators as well as  
330 activity-regulated TFs.

### 331 332 ***Rorb* KO delays excitatory input to barrel cortex.**

333 To examine whether ROR $\beta$  loss impacts network activity we examined inhibitory and excitatory  
334 synaptic properties of L4 neurons. We found no change in inhibitory innervation at P14 or P24 as  
335 measured by miniature inhibitory postsynaptic currents (mIPSCs), Figure 6-figure supplement A-  
336 B. However, synaptic function as measured by miniature excitatory postsynaptic currents  
337 (mEPSCs) revealed a significant delay in excitatory input, Figure 6A-C. At P5, shortly after  
338 thalamocortical LTP has ended (Feldman et al., 1998), the frequency of mEPSCs was low and  
339 comparable in control and KO Figure 6B-C. At P7, when recurrent cortical synapses begin to  
340 sharply increase (Ashby and Isaac, 2011), controls showed increased mEPSC frequency. However,  
341 *Rorb* KO animals had a significantly lower mEPSC frequency at P7 (Figure 6A-C), suggesting

342 decreased functional synaptic input. At P10, *Rorb* KO neurons increased mEPSC frequency to  
 343 levels comparable with controls. This suggests synaptic connections were delayed by *Rorb* KO  
 344 mostly likely affecting recurrent excitatory connections. At P10, this defect in frequency is mostly  
 345 corrected, but *Rorb* KO also showed significantly increased mEPSC amplitude at P10, possibly  
 346 compensating for the delay at P7. These data  
 347 support a subtle functional disruption to the barrel  
 348 circuit in *Rorb* KO animals that is consistent with  
 349 the transcriptional changes.

350

351 **The putative ROR $\beta$  target, *Thsd7a*, is**  
 352 **required for adult TCA but not barrel wall**  
 353 **organization.**

354 To begin exploring the relationship between  
 355 disrupted gene expression in the *Rorb* KO and  
 356 barrel organization, we examined known  
 357 functions of genes differentially expressed at  
 358 multiple developmental time points. Two  
 359 candidates were identified with potential roles in  
 360 cell migration and synaptogenesis. PlexinD1  
 361 (*Plxnd1*) is a cell signaling molecule known to  
 362 play a role in pathfinding and synaptogenesis  
 363 (Chauvet et al., 2007; Wang et al., 2015).  
 364 Thrombospondin 7a (*Thsd7a*) regulates  
 365 endothelial cell migration (Wang et al., 2010) but,  
 366 it's role in the brain is unknown. In controls,  
 367 expression of both genes followed a similar  
 368 developmental trajectory as ROR $\beta$ , peaking  
 369 around P7 (Figure 7A). In the *Rorb* KO, *Plxnd1*  
 370 was significantly lower at P2 and P7 while *Thsd7a*  
 371 was significantly lower at all three time points. In  
 372 addition, we identified several differential ATAC  
 373 peaks near *Thsd7a* with significantly reduced  
 374 accessibility (Figure 7B). This included a peak  
 375 containing a strong ROR $\beta$  motif just downstream  
 376 of the transcription start site, suggesting *Thsd7a*  
 377 might be a direct target of ROR $\beta$  regulation.

378

379 There was no detectable disruption to barrel  
 380 organization in *Plxnd1* conditional KO mice  
 381 (*PlexinD1*<sup>fllox</sup> crossed to *Emx1-cre*, Figure 7C-D).  
 382 A *Thsd7a* constitutive KO also showed no  
 383 disruption to barrel wall organization at P7 or P30.  
 384 Interestingly, *Thsd7a* KO did show decreased  
 385 VGLUT2 contrast between barrels and septa at  
 386 P30 but not P7, suggesting *Thsd7a* is important  
 387 for maintenance of TCA organization in

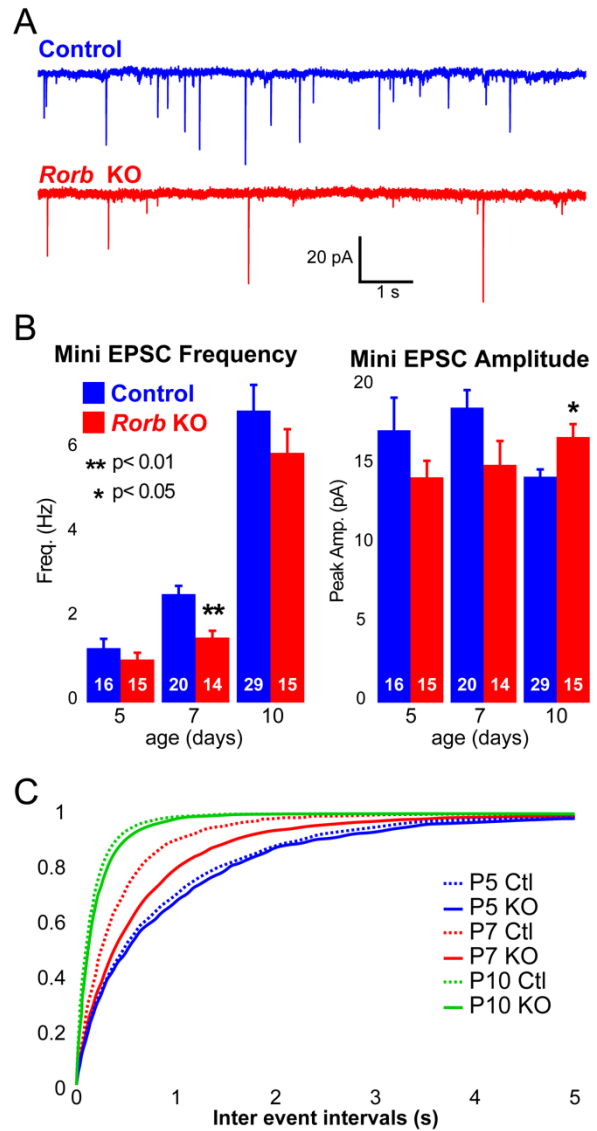

**Figure 6. *Rorb* KO delays excitatory input to barrel cortex.**

(A) Example of mini excitatory postsynaptic currents (mEPSCs) from L4 barrel cortex at P7.  
 (B) Average mEPSC frequency and from Ctl and *Rorb* KO L4 barrel cortex at P5, P7, and P10. Bars plot mean + SE, number of cells in parentheses. P values by 2-way ANOVA adjusted for multiple comparisons.  
 (C) Cumulative histogram of inter-event intervals for control and *Rorb* KO L4 barrel cortex at P5, P7, and P10.

388 adulthood (Figure 7C-D). The barrel phenotype of *Thsd7a* KO was qualitatively different from  
 389 *Rorb* KO barrels. Specifically, the overall barrel pattern remained more intact in the *Thsd7a* KO  
 390 despite the quantitative decrease in VGLUT2 contrast. *Thsd7a* KO may maintain sharper barrel

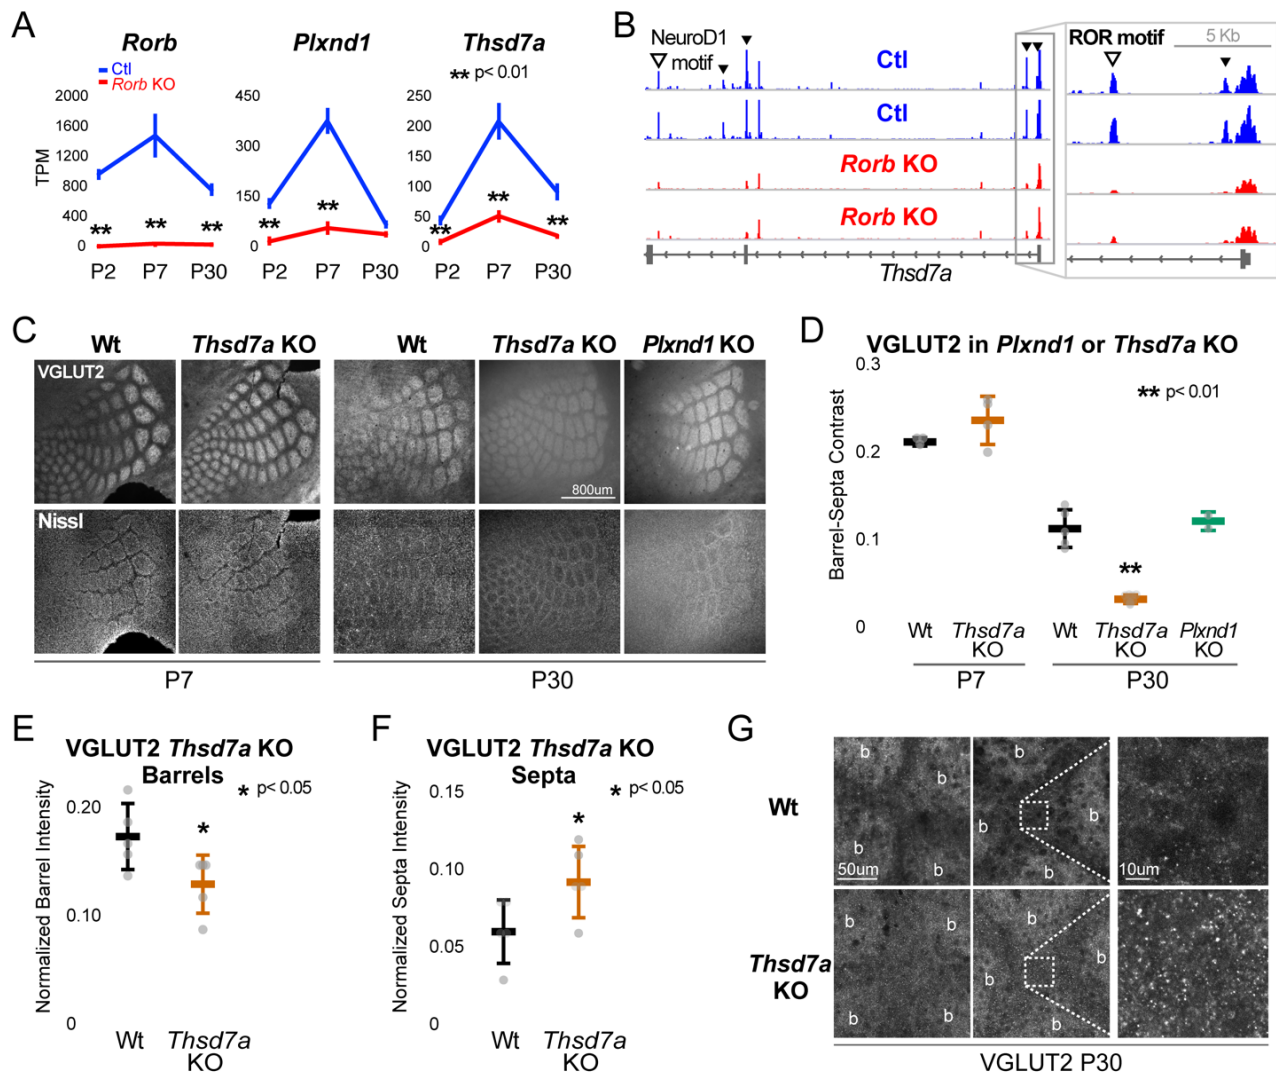

**Figure 7. *Thsd7a* is required for TCA but not barrel wall organization.**

(A) Line plots of transcripts per million (TPM) measured by RNA-seq for three genes (*ROR $\beta$* , *Thsd7a*, and *Plxnd1*) from Ctl (blue) or *Rorb* KO (red) S1 layer IV barrel cortex. Lines plot the mean  $\pm$  SE.

(B) ATAC-seq around the *Thsd7a* gene (as in Figure 5A).

(C) VGLUT2 and Nissl staining of whisker barrel cortex at P7 and P30 from wild-type (Wt), *Plxnd1* KO, or *Thsd7a* KO.

(D) Quantification of VGLUT2 Barrel-Septa Contrast from genetic lines in C. N=2-5 animals. Whisker plots as described for Figure 1B.

(E) Background normalized quantification of VGLUT2 contrast in barrel hollows. Two tissue sections containing the largest portions of whisker barrel field were averaged per animal. N=5, P30 animals per genotype. Whisker plots as described for Figure 1B.

(F) Background normalized quantification of VGLUT2 contrast in septa. Two tissue sections containing the largest portions of whisker barrel field were averaged per animal. N=5, P30 animals per genotype. Whisker plots as described for Figure 1B.

(G) VGLUT2 staining imaged at high magnification (63X) in P30 Wt or *Thsd7a* KO whisker barrel cortex. Barrels are labeled "b".

391 borders than the *Rorb* KO due to intact barrel walls. Reduction in VGLUT2 contrast in the *Thsd7a*  
392 KO could be due to increased TCA localization in the septa and/or decreased TCA localization in  
393 the barrels. To distinguish these two possibilities, three regions of low VGLUT2 staining adjacent  
394 to the barrel field were quantified and used for within tissue slice normalization of barrel and septa  
395 intensities. *Thsd7a* KO resulted in a 24% decrease in barrel hollow VGLUT2 signal and a 56%  
396 increase in the septa (Figure 7E-F). High resolution imaging showed a clear increase in VGLUT2  
397 puncta located in the septa (Figure 7G). Thus, loss of *Thsd7a* after *Rorb* KO likely contributes to  
398 the decrease in TCA segregation in adulthood.

399

## 400 DISCUSSION

401 While somatotopic maps were one of the earliest and most obvious forms of cytoarchitecture, our  
402 understanding of the role neuronal identity plays in module formation is largely unknown. Studies  
403 have long approached the question of what drives cortical organization from the perspective of  
404 network activity and, in the case of barrel cortex from the perspective of key structures and  
405 pathways needed to relay sensory input. More recent studies characterizing transcription factors  
406 required in the cortex for barrel organization points to the importance of molecular mechanisms  
407 regulating transcriptional programs. However, many of these TFs are part of the pathways that  
408 carry sensory input or are fundamental regulators of broad developmental programs. It was unclear  
409 whether a TF such as ROR $\beta$ , a highly restricted marker of L4 identity in the cortex, could influence  
410 macro-scale processes such as module formation. Indeed, we show that while ROR $\beta$  is clearly  
411 regulating only a fraction of the phenotypic and transcriptional properties of L4 neurons, it is  
412 necessary for terminal specification of L4 identity and proper organization of L4 cytoarchitecture.

413

414 Specifically, ROR $\beta$  is required in the cortex for barrel wall formation and full TCA segregation.  
415 This differs from earlier work focusing on the role of TCA patterning and activity as instructive  
416 for barrel wall formation. Instead, we find that loss of ROR $\beta$  specifically in the cortex affects TCA  
417 segregation shortly after barrel walls should have formed, suggesting that bidirectional signaling  
418 between L4 neurons and TCAs is involved in establishing proper organization. Few other studies  
419 highlight this role of cortical influence on TCA organization (Iwasato et al., 2000).

420

421 While desegregation and loss of TCA patterning worsened with age, removing ROR $\beta$  function  
422 after barrels form did not affect TCA segregation. From this we conclude the major contribution  
423 of ROR $\beta$  occurs before and/or during barrel development. Once barrels have fully formed, ROR $\beta$   
424 activity is not required to maintain TCA segregation. We note, however, that loss of the putative  
425 ROR $\beta$  gene target, *Thsd7a*, primarily affected TCA segregation in adults despite maximal  
426 expression at P7, which declines significantly by P30. One possibility involves *Thsd7a* functioning  
427 around the time of barrel formation to establish long lasting TCA structures that only manifest  
428 aberrant phenotypes later in life. Alternatively, the moderate expression level of *Thsd7a* at P30  
429 may be sufficient for a role in adult maintenance. In either case, a role for *Thsd7a* in the nervous  
430 system has not been described previously. In endothelial cells, *Thsd7a* localizes to the membrane  
431 of the leading edge of migrating cells where it functions to slow or inhibit migration (Wang et al.,  
432 2010). Perhaps in somatosensory cortex it inhibits movement of nearby projections such as  
433 dendrites or axons allowing cortical neurons to “corral” TCAs in barrel hollows.

434

435 Our observation that barrel organization declined with age is very interesting and possibly the first  
436 description of this phenomenon in mice (Rice, 1985). It suggests continued plasticity or

437 degradation of maintenance mechanisms over time. Few studies have examined plasticity within  
438 this structure in adulthood. This is in part because studies have shown a decline in the capacity to  
439 rewire sensory input to the cerebral cortex with age in certain systems. In the visual system, loss  
440 of sensory input has been shown to alter TCAs during a critical postnatal period (Antonini and  
441 Stryker, 1993; Erzurumlu and Gaspar, 2012). It is thought that once this critical period closes,  
442 TCA organization is fixed. Thus, developmental processes in the visual and somatosensory  
443 systems are assumed to stabilize TCAs and restrict learning and memory related changes to  
444 plasticity among cortical connections (Fox, 2002; Feldman and Brecht, 2005; De Paola et al., 2006;  
445 Karmarkar and Dan, 2006). However, there is some evidence to support a shift in this model of  
446 adult plasticity in both the visual and somatosensory cortex (Khibnik et al., 2010; Wimmer et al.,  
447 2010). In particular, Oberlaender et al. showed that a mild form of sensory deprivation induced by  
448 whisker trimming in 3-month old rats substantially altered TCAs in barrel cortex (Oberlaender et  
449 al., 2012). However, because adult TCA plasticity has garnered limited attention, we currently lack  
450 genetic studies examining the molecular mechanisms behind these processes. The natural decline  
451 in barrel organization and the mechanism of *Thsd7a* influence on TCA segregation merit further  
452 investigation as exciting new contexts to study both the functional roles of cortical organization  
453 and the impact of age.

454  
455 Recent studies are revealing that neuronal identity in certain structures remains plastic during early  
456 postnatal periods. For example, mistargeted L4 neurons that migrate to layer 2/3 take on  
457 characteristics of their surroundings (Oishi et al., 2016b) and misexpression of some TF can alter  
458 the identity of postnatal neurons (Rouaux and Arlotta, 2010; 2013). We find that loss of ROR $\beta$   
459 shifts the transcriptional identity of L4 neurons to a more L5-like profile. This likely occurs  
460 through complex reorchestration of gene regulation. Upregulation of known L5 TFs such as  
461 *Bcl11b/Citp* and *Etv1* at P2 may help drive an early diversion down an L5 trajectory. Regulatory  
462 signatures detected in adult neurons such as closure of binding sites for *Zfp281* enriched near L4  
463 genes and opening of *Nfe211/3* motifs enriched near L5 genes may represent the tip of the  
464 developmental iceberg. In addition, our stringent motif analysis aimed to keep false positives low  
465 but may also miss relevant regulators with more minor roles. While we detect changes in binding  
466 capacity for many TFs, including ROR $\beta$ , the complexity of dysregulation spread out across early  
467 postnatal development means there are certainly additional mechanisms driving this shift in  
468 cellular identity to be discovered. Here we combine the power of genetic knock-out strategies with  
469 multiple molecular profiling assays to interrogate the transcriptional network influenced by ROR $\beta$ .  
470 We found RNA-seq paired with ATAC-seq provided a rich picture of the transcriptional changes  
471 occurring in *Rorb* KO neurons and insight into both developmental and adult functioning. Changes  
472 to the transcriptional network involved both differentially expressed TFs and TFs whose only  
473 perturbation was increased or decreased access to binding sites. Without these complementary  
474 perspectives, proteins such as *Zfp281* and *Nfe211/3* TFs might have been overlooked.

475  
476 We identify several other TFs worthy of further investigation for their role in cortical development.  
477 *Ascl1* and *NeuroD1* are potent TFs that can induce transdifferentiation of mouse embryonic  
478 fibroblasts or microglia into neurons (Vierbuchen et al., 2010; Matsuda et al., 2019). *NeuroD1*  
479 binds a different motif than *NeuroD2*, which is known to regulate barrel formation (Ince-Dunn et  
480 al., 2006), suggesting a distinct role. In addition, *Trps1* was strongly upregulated by ROR $\beta$  loss at  
481 P7 and P30, and was enriched in regions that opened. Its role in neurons is not clear, but it has  
482 been characterized as a transcriptional repressor that inhibits cell migration making it a tempting

483 target to explore the lack of L4 neuron migration necessary to form barrel walls (Wang et al.,  
484 2018).

485  
486 In addition to disrupted layer identity we also detect a significant disruption in the potential for  
487 *Rorb* KO cells to transcriptionally respond to activity connecting cellular identity, module  
488 formation and molecular responsiveness to input. In the adult *Rorb* KO, many activity-regulated  
489 TFs were upregulated, with the exception of *Btbd3*, and their DNA motifs showed increased  
490 accessibility. Around P7, when activity is critical for instructing cortical reorganization, we see  
491 reduced mEPSC frequency in L4 *Rorb* KO neurons, which is rectified by P10. Some of the  
492 transcriptional changes in the *Rorb* KO may be a form of compensation for the lack of input at P7.  
493 Failed upregulation of *Htr1b* and downregulation of *S100a10/p11* may also be an attempt to  
494 increase activity in KO neurons. More is known about the role of *Htr1b* in TCAs where it is  
495 transiently expressed and, when stimulated, inhibits thalamic neuronal firing (Bennett-Clarke et  
496 al., 1993; Rhoades et al., 1994) and disrupts barrel formation (Young-Davies et al., 2000). TCA  
497 inhibition is thought to be the mechanism by which excess 5-HT disrupts barrels. While it is  
498 difficult to infer the role of *Htr1b* and *p11* without characterizing cellular localization in S1 L4  
499 neurons, downregulation of *p11* resulting in less *Htr1b* localizing to the membrane coupled with  
500 reduced *Htr1b* expression could relieve inhibition in L4 *Rorb* KO neurons. Barrel formation and  
501 the ability to respond to activity inputs corresponds with increased ROR $\beta$  expression and this  
502 increase is attenuated when TCA inputs are eliminated (Pouchelon et al., 2014). Together this  
503 suggests terminal differentiation and migration of neurons within L4 to form barrel walls are  
504 closely synchronized to excitatory input and require ROR $\beta$  for proper establishment.

505  
506 Although few other studies have examined the transcriptional targets and molecular mechanisms  
507 of TFs that regulate barrel formation, our study suggests ROR $\beta$  is likely involved in the later stages  
508 of cellular specification and implicates several new TFs. ROR $\beta$  also appears to function by distinct  
509 mechanisms from TFs previously characterized to regulate barrel formation. Loss of *Bhlhe22*  
510 disrupts both barrel wall formation and TCA segregation but results in downregulation of *Lmo4*  
511 (Joshi et al., 2008), unlike *Rorb* KO which increased *Lmo4*. Interestingly, *Eomes* is required for  
512 barrel wall organization but does not appear to affect TCA segregation (Elsen et al., 2013). *Lhx2*  
513 and ROR $\alpha$  are more broadly expressed than ROR $\beta$ . *Lhx2* KO results in moderate down regulation  
514 of ROR $\beta$  suggesting it is also likely upstream of ROR $\beta$  in barrel development (Wang et al., 2017).  
515 Loss of *Lhx2* greatly reduced TCA branching producing smaller barrels and barrel field. This  
516 phenotype is very similar to *Rora* KO barrels (Vitalis et al., 2017) suggesting ROR $\alpha$ 's mechanism  
517 may be more similar to earlier developmental TFs than to ROR $\beta$ . Disruption of barrelettes  
518 development in *Rora* KO thalamus is also consistent with a role in earlier stages of development.  
519 On the other hand, several TFs appear to be downstream of processes regulated by ROR $\beta$ . For  
520 example, *Btbd3* is important for dendritic orientation and is downregulated in the *Rorb* KO. It may  
521 be that dendritic orientation occurs after L4 cells have migrated to form barrel walls and provide  
522 an organized reference point for orientation. Thus, we have characterized in depth the molecular  
523 and transcriptional mechanism of ROR $\beta$  as it orchestrates a critical juncture in barrel development  
524 where terminal differentiation and activity inputs are integrated to drive cellular organization in  
525 the cortex.

526  
527 **Materials and Methods**

528

## 529 **Animals**

530 All animals were bred, housed, and cared for in Foster Biomedical Research Laboratory at  
531 Brandeis University (Waltham, MA, USA). Animals were provided with food and water *ad libitum*  
532 and kept on a 12hr:12hr light:dark cycle. Cages were enriched with huts, chew sticks, and tubes.  
533 All experiments were approved by the Institutional Animal Care and Use Committee of Brandeis  
534 University, Waltham, MA, USA.

535  
536 *Rorb<sup>GFP</sup>* (*Rorb<sup>lg</sup>*) and *Rorb<sup>ff</sup>* (*Rorb<sup>lox/lox</sup>*) mice were obtained from Dr. Douglas Forrest (Liu et al.,  
537 2013; Koch et al., 2017; Byun et al., 2019). *Rorb<sup>GFP</sup>* mutation deletes the ROR $\beta$ 1 isoform, the  
538 predominant isoform in brain, and not the ROR $\beta$ 2 isoform (Liu et al., 2013). The *Rorb<sup>ff</sup>* allele  
539 deletes both isoforms. The following mice were obtained from Jackson Laboratories: TDTomato  
540 (stock 007909, RRID:IMSR\_JAX:007909); plexinD1flox (stock 018319,  
541 RRID:IMSR\_JAX:018319); Thrombospondin7a (Thsd7a) (stock 027218, RRID:MGI:6263683);  
542 EMX1-IRES-cre (Emx1-cre) (stock 005628, RRID:IMSR\_JAX:005628); SertCre (Slc6a4) (stock  
543 014554, RRID:IMSR\_JAX:014554). CamK2a-cre (stock 005359, RRID:IMSR\_JAX:005359).

## 544 **Perfusion**

545  
546 Animals were fatally anesthetized and transcardially perfused with 15mL 1x PBS (Fisher,  
547 SH3001304) then 15mL 4% PFA (Sigma Aldrich P6148-500G). Brains were fixed overnight in  
548 tangential orientation. After removing the whole brain from the skull, the cerebellum and olfactory  
549 bulbs were removed. The brain was split into two hemispheres along the longitudinal fissure and  
550 the midbrain was gently excised. The remaining cortex was placed in a shallow well made from a  
551 cryostat mold, filled with 4% PFA and a glass slide set on top for flattening. Brains were removed  
552 from PFA after 24-48 hours and stored in 30% sucrose/PBS solution at 4°C.

## 553 **Immunohistochemistry**

554  
555 50 $\mu$ m slices were made on a freezing Microtome (Leica SM 2010R). Controls and KOs were  
556 stained together in batches. Slices were permeabilized overnight at 4°C in 0.3% Triton-X100  
557 (Sigma Aldrich, T8787) and 3% Bovine Serum Albumin (Sigma B4287-25G) in PBS. Slices were  
558 then incubated for 24 hours in primary antibody solution containing 0.3% Triton-X100 and 3%  
559 Bovine Serum Albumin in PBS at 4C. Primary antibody dilutions were as follows: Guinea pig  
560 anti-VGLUT2 (Millipore AB2251, RRID:AB\_2665454) 1:500-1:1000, rabbit anti-VGLUT2  
561 (Synaptic Systems 135 403, RRID:AB\_887883) 1:250, chicken anti-GFP (Aves labs GFP-1020,  
562 RRID: AB\_10000240) 1:500-1:1000. Slices were washed 3 times in PBS for 10 minutes each at  
563 room temp and then moved to secondary antibody solution containing 0.3% Triton-X100, 3%  
564 Bovine Serum Albumin, 10% normal goat serum. All secondaries were used at 1:500; Goat Anti-  
565 Rabbit Alexa Fluor 564 (Invitrogen A-11037, RRID:AB\_2534095), Goat Anti-Chicken Alexa  
566 Fluor 488 (Invitrogen A-11039, RRID:AB\_2534096), Goat Anti-Rabbit Alexa Fluor 633  
567 (Invitrogen A-21070, RRID:AB\_2535731), Goat Anti-Guinea Pig Alexa Fluor 647 (Invitrogen A-  
568 21450, RRID:AB\_2735091). Slices were stained using Nissl (Invitrogen N21479) at 1:250 in PBS  
569 for 2 hours at room temperature, washed in PBS as before, and mounted in VECTASHIELD  
570 HardSet Mounting Medium (Vector Laboratories, H-1500, RRID:AB\_2336787). Slides were  
571 stored at -20C and imaged within 1 week.

## 572 **Imaging and fluorescence quantification**



574 Tissue was imaged on a Leica DMI 6000B Inverted Widefield Imaging Fluorescence Microscope  
575 or a Zeiss LSM 880 confocal microscope. All genotypes and age groups contained roughly even  
576 numbers of males and females. A minimum of two slices containing at least 5 intact barrels  
577 between rows B-D were quantified per animal. Experimenters were blinded to age and genotype  
578 during imaging and quantification. Regions of interest (ROIs) were drawn manually by a blinded  
579 researcher around 5-6 intact barrels from rows B, C, or D using Fiji (Schindelin et al., 2012). An  
580 ROI including the total space around selected barrels up to the edges of adjacent barrels was drawn  
581 to be used for calculating septa intensity (Figure 8). For *Thsd7a* KO and controls, three additional  
582 ROIs were drawn in the region adjacent to barrel cortex with low VGLUT2 signal to be used as  
583 background to normalize barrel and septa intensity. Custom MATLAB code was used to  
584 quantify the average fluorescence in ROIs. Septa intensity was calculated as septa total ROI  
585 intensity - sum(barrel ROIs). Contrast = (barrel - septa) / (barrel + septa). Contrast and  
586 normalized barrel and septa intensity were calculated and then averaged for 2 slices per  
587 animal. Two-way ANOVA was used to test for a significant effect of genotype and/or age as  
588 well as for an interaction between the two variables. Independent sample t-test was used to  
589 test for significant differences between genotypes at each age.  
590  
591  
592  
593  
594  
595  
596  
597

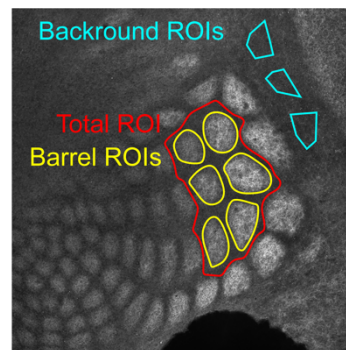

Septa intensity = Total intensity -  $\sum$ Barrel intensities

**Figure 8. Example of quantification method.**  
Regions of interest (ROIs) were drawn in Fiji by a researcher blinded to genotype and age.

### Electrophysiology

598  
599 *Rorb<sup>GFP/GFP</sup>* (KO) and *Rorb<sup>GFP/+</sup>* (control; Ctl) mice were anesthetized with isoflurane and  
600 decapitated. Coronal slices (300 $\mu$ m) containing the primary somatosensory cortex were cut on a  
601 Leica (VT1000S) vibratome and incubated at room temperature in ACSF containing (mM) 126  
602 NaCl, 25 NaHCO<sub>3</sub>, 2.5 KCl, 1.2 NaHPO<sub>4</sub>, 2 CaCl<sub>2</sub>, 1 MgCl<sub>2</sub> and 32.6 dextrose adjusted to 326  
603 mOsm, pH 7.4 and saturated with 95%/5% O<sub>2</sub>/CO<sub>2</sub>. Submerged, whole cell recordings were  
604 performed at 32  $\pm$  1 $^\circ$  on an upright microscope (Olympus BX50) equipped with epifluorescence.  
605 Pipettes with resistance 4-6 Mohm were filled with internal solution containing (mM) 100 K-  
606 gluconate, 20 KCl, 10 HEPES, 4 Mg-ATP, 0.3 Na-GTP, 10 Na-phosphocreatine and 0.2% biocytin  
607 adjusted to 300 mOsm, pH 7.35. For mIPSC recordings, the internal included 133 mM KCl and  
608 gluconate was omitted to bring E<sub>Cl</sub> to 0mV. Recordings were made using an Axoclamp 700A  
609 amplifier, and were digitized at 10-20kHz and analyzed using custom software running under Igor  
610 6.03 (Wavemetrics). Miniature synaptic events were recorded in voltage clamp at -70mV in the  
611 presence of PTX (mEPSCs) or DNQX+APV (mIPSCs) respectively.  
612

613 Spiny stellate neurons were recognized based on their compact, GFP<sup>+</sup> cell bodies within the GFP<sup>+</sup>  
614 cell-dense layer 4. Input resistance was measured every 10-20 s with a small hyperpolarizing pulse  
615 and data were discarded if input or series resistance changed by >20%. P-values were calculated  
616 by 2-way ANOVA and adjusted for multiple comparisons by Tukey post hoc correction.  
617

### RNA-seq

618

619 RNA-seq was performed as described previously (Sugino et al., 2019). Briefly, 1000-1500 GFP<sup>+</sup>  
620 cells were isolated by FACS (BD FACSAria Flow Cytometer) from micro dissected L4 S1 live  
621 tissue (N=4 biological replicates per age and genotype). [Figure 9](#) shows examples of the region  
622 micro dissected out to exclude L5. The four  
623 independent biological samples were collected  
624 from a pool generated by combining tissue from  
625 one male and one female mouse for a total of 8  
626 animals used per time point. Cells were sorted  
627 directly into extraction buffer and RNA stored at  
628 -80C for < three weeks. All libraries were  
629 prepared and sequenced in a single batch to  
630 prevent batch effects. Total RNA was purified  
631 (Arcturus PicoPure RNA Isolation kit,  
632 KIT0204) according to manufacturer's  
633 specifications. Libraries were prepared using  
634 Ovation Trio RNA-Seq library preparation kit  
635 with mouse rRNA depletion (0507-32)  
636 according to manufacturer's specifications and sequenced on a NextSeq Illumina platform  
637 (NextSeq 500/550 High Output (1 x 75 cycles)) obtaining  $27 \pm 2$  million reads (mean  $\pm$  SE). Reads  
638 were mapped by STAR with  $90\% \pm 0.3\%$  unique mapping (mean  $\pm$  SE) and quantified with  
639 featureCounts (Liao et al., 2014). Differentially expressed genes were identified by Limma  
640 (Ritchie et al., 2015) using a fold change cutoff of 2 and  $\text{padj} < 0.01$  from a moderated t-test adjusted  
641 for multiple comparisons using FDR (Benjamini-Hochberg).

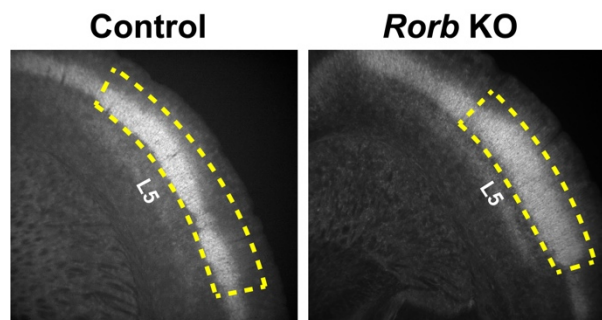

**Figure 9. Example micro dissection of L4 S1 from coronal slices.**

Yellow dashed line indicates the outline of tissue retained for FACS.

#### 642 643 **ATAC-seq**

644 ATAC-seq was performed as described previously (Sugino et al., 2019). Briefly, 30,000 - 50,000  
645 GFP<sup>+</sup> cells were isolated by FACS from microdissected L4 live tissue (N=2 biological replicates  
646 per age and genotype). The two independent samples were collected from a pool generated by  
647 combining tissue from two male and two female mice for a total of 8 animals used. Nuclei were  
648 transposed for 30 minutes and libraries amplified according to published methods (Corces et al.,  
649 2017). Tagmented nuclei were stored at -20C for < two weeks. All ATAC libraries were purified,  
650 amplified, and sequenced as a single batch. Libraries were sequenced on a NextSeq Illumina  
651 platform (high output 300 cycles (2 x 150bp)) producing  $105 \pm 24$  (mean  $\pm$  SE) million reads per  
652 replicate. Reads were mapped using Bowtie2 and filtered producing  $24 \pm 2$  (mean  $\pm$  SE) million  
653 unique non-mitochondrial reads per replicate. TSS enrichment calculated per replicate according  
654 to the ENCODE quality metric (Corces et al., 2017) (<https://github.com/ENCODE-DCC/atac-seq-pipeline>) was  $34 \pm 3$  (mean  $\pm$  SE). Peaks were identified permissively using HOMER (-style dnase  
656 -fdr 0.5 -minDist 150 -tbp 0 -size 75 -regionRes 0.75 -region) (Heinz et al., 2010) and IDR  
657 (threshold=0.01, pooled\_threshold=0.01) was used to identify reproducible peaks (Li et al., 2011).  
658 Differential ATAC peaks were identified using DiffBind with an FDR threshold=0.02 and log2  
659 fold change in normalized read coverage threshold  $\geq 1$  (Ross-Innes et al., 2012).

660  
661 RNA-seq and ATAC-seq datasets are available at GEO accession GSE138001.

#### 662 663 664 **Motif Analysis**

665 Motifs identified *de novo* from the sequences underlying ATAC peaks was carried out using  
 666 MEME AME with shuffled input sequences as control and default settings (Fraction of maximum  
 667 log-odds = 0.25, E-value threshold  $\leq 10$ ) (McLeay and Bailey, 2010), and HOMER  
 668 findMotifsGenome.pl function masking repeats and -size given (Heinz et al., 2010). Scanning for  
 669 specific motif matches in the sequences underlying ATAC peaks was carried out using MEME  
 670 FIMO used the default threshold of p-value  $< 1e-4$  (Grant et al., 2011) and HOMER  
 671 findMotifsGenome.pl -find function. When possible 2-3 PWMs were obtained from Jaspar (Khan  
 672 et al., 2018) and Cis-BP (Weirauch et al., 2014) prioritizing PWMs from direct data sources such  
 673 as ChIP-seq. The R package GenomicRanges (Lawrence et al., 2013) was used to identify  
 674 overlapping motifs between the two algorithms for cross validation. The overlap criteria allowed  
 675 a 1 bp difference in the start or end position of the motif to accommodate ambiguity among motif  
 676 models. Fisher Exact tests were calculated in R to test for enrichment of motifs in ATAC regions  
 677 compared to control regions and to test for enrichment of genes with a nearby motif from a DEG  
 678 group compared to a control group of genes. The set of control regions was generated by shuffling  
 679 ATAC peaks throughout the genome excluding sequence gaps using BedTools (Quinlan and Hall,  
 680 2010) and the control group of genes were defined as expressed above 5 TPM but unchanged by  
 681 age or *Rorb* KO.

682  
 683 **Acknowledgments**

684 We thank Dr. Roland Schüle for agreeing to share the *Rorb<sup>fl/fl</sup>* line, and Dr. Matthew Eaton for  
 685 friendly bioinformatic advice. Supported in part by the intramural research program at NIDDK at  
 686 the National Institutes of Health (DF).

687  
 688  
 689 **Supplemental Figures**  
 690

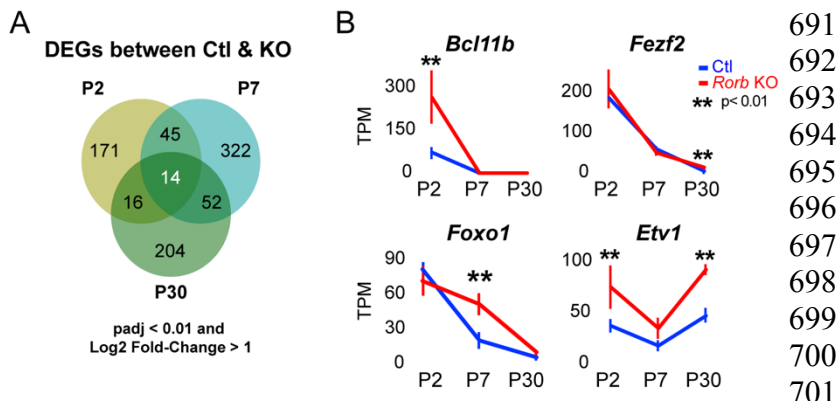

691  
 692  
 693  
 694  
 695  
 696  
 697  
 698  
 699  
 700  
 701

**Figure 4 supplement. *Rorb* KO shifts the expression profile of neurons from a layer 4 to layer 5.**

(A) Differentially expressed genes (DEGs) at each age identified by RNA-seq.  
 (B) RNA-seq expression of layer 5 TFs. Lines plot the mean  $\pm$  SE. P by moderated t-test adjusted for multiple comparisons (Benjamini-Hochberg).

707  
 708  
 709  
 710

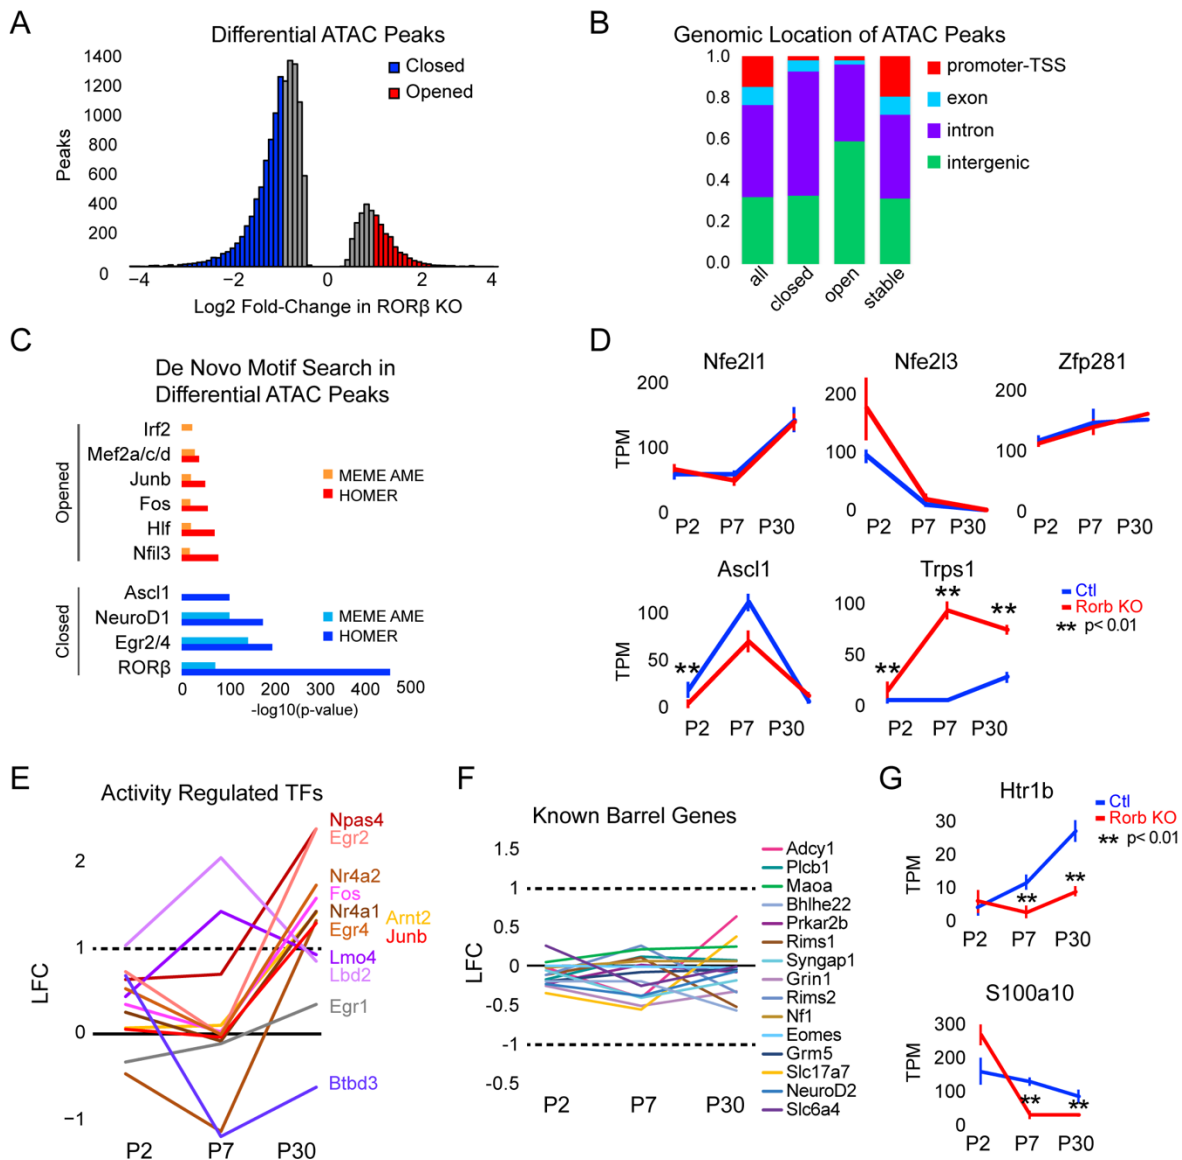

**Figure 5 supplement. *Rorb* KO disrupts transcription factor binding sites near DEGs.**

(A) Differential ATAC peaks identified by DiffBind with Log2 Fold change (LFC) > 1 and FDR < 0.02.

(B) Genomic distribution of ATAC-seq peaks identified in ROR $\beta$  control and *Rorb* KO. All peaks; all ATAC peaks in Ctl and KO, closed and opened peaks as defined in (B), stable; peaks with the lowest LFC between control and KO. Promoter defined as 2 Kb upstream of an annotated TSS.

(C) De novo motif searching in differential ATAC peaks using two independent algorithms, MEME AME function and HOMER. Only motifs for TFs expressed in either sample are plotted.

(D) RNA-seq expression of TFs with motifs in ATAC peaks. Lines plot the mean  $\pm$  SE. P by moderated t-test adjusted for multiple comparisons (Benjamini-Hochberg).

(E-F) RNA-seq log2 fold-c (LFC) for (E) activity-regulated transcription factors and (F) genes previously described to have a role in barrel organization.

(G) RNA-seq of genes involved in serotonin signaling. Plots as in (D).

713  
714

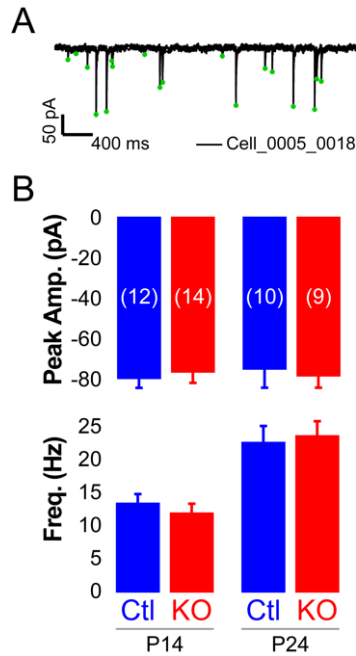

**Figure 6 supplement. *Rorb* KO has minor effects on inhibitory input.**

(A) Example mini IPSC in one cell.  
(B) Mini IPSC amplitude (middle graph) and frequency (bottom graph) at P14 and P24. Bars plot mean + SE, N cells listed on upper graph.

715  
716

## References

- 717 Abdel-Majid RM, Leong WL, Schalkwyk LC, Smallman DS, Wong ST, Storm DR, Fine A,  
718 Dobson MJ, Guernsey DL, Neumann PE (1998) Loss of adenylyl cyclase I activity disrupts  
719 patterning of mouse somatosensory cortex. *Nat Genet* 19:289–291.
- 720
- 721 Antonini A, Stryker MP (1993) Development of individual geniculocortical arbors in cat striate  
722 cortex and effects of binocular impulse blockade. *J Neurosci* 13:3549–3573.
- 723 Ashby MC, Isaac JTR (2011) Maturation of a recurrent excitatory neocortical circuit by  
724 experience-dependent unsilencing of newly formed dendritic spines. *Neuron* 70:510–521.
- 725 Ballester Rosado CJ, Sun H, Huang J-Y, Lu H-C (2016) mGluR5 Exerts Cell-Autonomous  
726 Influences on the Functional and Anatomical Development of Layer IV Cortical Neurons in  
727 the Mouse Primary Somatosensory Cortex. *J Neurosci* 36:8802–8814.
- 728 Barnett MW, Watson RF, Vitalis T, Porter K, Komiyama NH, Stoney PN, Gillingwater TH,  
729 Grant SGN, Kind PC (2006) Synaptic Ras GTPase activating protein regulates pattern  
730 formation in the trigeminal system of mice. *J Neurosci* 26:1355–1365.
- 731 Beaumont TL, Yao B, Shah A, Kapatos G, Loeb JA (2012) Layer-specific CREB target gene  
732 induction in human neocortical epilepsy. *J Neurosci* 32:14389–14401.
- 733 Bennett-Clarke CA, Leslie MJ, Chiaia NL, Rhoades RW (1993) Serotonin 1B receptors in the  
734 developing somatosensory and visual cortices are located on thalamocortical axons. *PNAS*  
735 90:153–157.

- 736 Buenrostro JD, Wu B, Chang HY, Greenleaf WJ (2015) ATAC-seq: A Method for Assaying  
737 Chromatin Accessibility Genome-Wide. *Curr Protoc Mol Biol* 109:21.29.1–29.9.
- 738 Byun H, Lee H-L, Liu H, Forrest D, Rudenko A, Kim I-J (2019) Rorb $\beta$  regulates selective axon-  
739 target innervation in the mammalian midbrain. *Development* 146:dev171926.
- 740 Cases O, Seif I, Grimsby J, Gaspar P, Chen K, Pournin S, Müller U, Aguet M, Babinet C, Shih  
741 JC (1995) Aggressive behavior and altered amounts of brain serotonin and norepinephrine in  
742 mice lacking MAOA. *Science* 268:1763–1766.
- 743 Catania KC, Kaas JH (1995) Organization of the somatosensory cortex of the star-nosed mole. *J*  
744 *Comp Neurol* 351:549–567.
- 745 Chauvet S, Cohen S, Yoshida Y, Fekrane L, Livet J, Gayet O, Segu L, Buhot M-C, Jessell TM,  
746 Henderson CE, Mann F (2007) Gating of Sema3E/PlexinD1 signaling by neuropilin-1  
747 switches axonal repulsion to attraction during brain development. *Neuron* 56:807–822.
- 748 Chen Y, Wang Y, Ertürk A, Kallop D, Jiang Z, Weimer RM, Kaminker J, Sheng M (2014)  
749 Activity-induced Nr4a1 regulates spine density and distribution pattern of excitatory  
750 synapses in pyramidal neurons. *Neuron* 83:431–443.
- 751 Corces MR et al. (2017) An improved ATAC-seq protocol reduces background and enables  
752 interrogation of frozen tissues. *Nat Meth* 14:959–962.
- 753 Datwani A, Iwasato T, Itohara S, Erzurumlu RS (2002) Lesion-induced thalamocortical axonal  
754 plasticity in the S1 cortex is independent of NMDA receptor function in excitatory cortical  
755 neurons. *J Neurosci* 22:9171–9175.
- 756 De Paola V, Holtmaat A, Knott G, Song S, Wilbrecht L, Caroni P, Svoboda K (2006) Cell type-  
757 specific structural plasticity of axonal branches and boutons in the adult neocortex. *Neuron*  
758 49:861–875.
- 759 Doyle JP, Dougherty JD, Heiman M, Schmidt EF, Stevens TR, Ma G, Bupp S, Shrestha P, Shah  
760 RD, Doughty ML, Gong S, Greengard P, Heintz N (2008) Application of a translational  
761 profiling approach for the comparative analysis of CNS cell types. *Cell* 135:749–762.
- 762 Elsen GE, Hodge RD, Bedogni F, Daza RAM, Nelson BR, Shiba N, Reiner SL, Hevner RF  
763 (2013) The protomap is propagated to cortical plate neurons through an Eomes-dependent  
764 intermediate map. *Proc Natl Acad Sci USA* 110:4081–4086.
- 765 Erzurumlu RS, Gaspar P (2012) Development and critical period plasticity of the barrel cortex.  
766 *Eur J Neurosci* 35:1540–1553.
- 767 Feldman DE, Brecht M (2005) Map plasticity in somatosensory cortex. *Science* 310:810–815.
- 768 Feldman DE, Nicoll RA, Malenka RC, Isaac JT (1998) Long-term depression at thalamocortical  
769 synapses in developing rat somatosensory cortex. *Neuron* 21:347–357.

- 770 Fox K (1992) A critical period for experience-dependent synaptic plasticity in rat barrel cortex. *J*  
771 *Neurosci* 12:1826–1838.
- 772 Fox K (2002) Anatomical pathways and molecular mechanisms for plasticity in the barrel cortex.  
773 *Neuroscience* 111:799–814.
- 774 Fremeau RT, Troyer MD, Pahner I, Nygaard GO, Tran CH, Reimer RJ, Bellocchio EE, Fortin D,  
775 Storm-Mathisen J, Edwards RH (2001) The expression of vesicular glutamate transporters  
776 defines two classes of excitatory synapse. *Neuron* 31:247–260.
- 777 Gachon F, Fonjallaz P, Damiola F, Gos P, Kodama T, Zakany J, Duboule D, Petit B, Tafti M,  
778 Schibler U (2004) The loss of circadian PAR bZip transcription factors results in epilepsy.  
779 *Genes & Development* 18:1397–1412.
- 780 Grant CE, Bailey TL, Noble WS (2011) FIMO: scanning for occurrences of a given motif.  
781 *Bioinformatics* 27:1017–1018.
- 782 Hannan AJ, Blakemore C, Katsnelson A, Vitalis T, Huber KM, Bear M, Roder J, Kim D, Shin  
783 HS, Kind PC (2001) PLC-beta1, activated via mGluRs, mediates activity-dependent  
784 differentiation in cerebral cortex. *Nat Neurosci* 4:282–288.
- 785 Hawkins NA, Kearney JA (2016) Hlf is a genetic modifier of epilepsy caused by voltage-gated  
786 sodium channel mutations. *Epilepsy Res* 119:20–23.
- 787 Heinz S, Benner C, Spann N, Bertolino E, Lin YC, Laslo P, Cheng JX, Murre C, Singh H, Glass  
788 CK (2010) Simple combinations of lineage-determining transcription factors prime cis-  
789 regulatory elements required for macrophage and B cell identities. *Mol Cell* 38:576–589.
- 790 Huang Z, Kawase-Koga Y, Zhang S, Visvader J, Toth M, Walsh CA, Sun T (2009) Transcription  
791 factor Lmo4 defines the shape of functional areas in developing cortices and regulates  
792 sensorimotor control. *Dev Biol* 327:132–142.
- 793 Inan M, Lu H-C, Albright MJ, She W-C, Crair MC (2006) Barrel map development relies on  
794 protein kinase A regulatory subunit II beta-mediated cAMP signaling. *J Neurosci* 26:4338–  
795 4349.
- 796 Ince-Dunn G, Hall BJ, Hu S-C, Ripley B, Haganir RL, Olson JM, Tapscott SJ, Ghosh A (2006)  
797 Regulation of thalamocortical patterning and synaptic maturation by NeuroD2. *Neuron*  
798 49:683–695.
- 799 Iwasato T, Datwani A, Wolf AM, Nishiyama H, Taguchi Y, Tonegawa S, Knöpfel T, Erzurumlu  
800 RS, Itohara S (2000) Cortex-restricted disruption of NMDAR1 impairs neuronal patterns in  
801 the barrel cortex. *Nature* 406:726–731.
- 802 Iwasato T, Erzurumlu RS, Huerta PT, Chen DF, Sasaoka T, Ulupinar E, Tonegawa S (1997)  
803 NMDA receptor-dependent refinement of somatotopic maps. *Neuron* 19:1201–1210.

- 804 Jabaudon D, Shnyder SJ, Tischfield DJ, Galazo MJ, Macklis JD (2012) ROR $\beta$  induces barrel-like  
805 neuronal clusters in the developing neocortex. *Cereb Cortex* 22:996–1006.
- 806 Joshi PS, Molyneaux BJ, Feng L, Xie X, Macklis JD, Gan L (2008) Bhlhb5 regulates the  
807 postmitotic acquisition of area identities in layers II-V of the developing neocortex. *Neuron*  
808 60:258–272.
- 809 Karmarkar UR, Dan Y (2006) Experience-dependent plasticity in adult visual cortex. *Neuron*  
810 52:577–585.
- 811 Kashani AH, Qiu Z, Jurata L, Lee S-K, Pfaff S, Goebbels S, Nave K-A, Ghosh A (2006)  
812 Calcium activation of the LMO4 transcription complex and its role in the patterning of  
813 thalamocortical connections. *J Neurosci* 26:8398–8408.
- 814 Kawasaki H (2015) Spatio-temporal regulation of the formation of the somatosensory system.  
815 *Dev Growth Differ* 57:193–199.
- 816 Khan A, Fornes O, Stigliani A, Gheorghe M, Castro-Mondragon JA, van der Lee R, Bessy A,  
817 Chèneby J, Kulkarni SR, Tan G, Baranasic D, Arenillas DJ, Sandelin A, Vandepoele K,  
818 Lenhard B, Ballester B, Wasserman WW, Parcy F, Mathelier A (2018) JASPAR 2018:  
819 update of the open-access database of transcription factor binding profiles and its web  
820 framework. *Nucleic Acids Res* 46:D260–D266.
- 821 Khibnik LA, Cho KKA, Bear MF (2010) Relative contribution of feedforward excitatory  
822 connections to expression of ocular dominance plasticity in layer 4 of visual cortex. *Neuron*  
823 66:493–500.
- 824 Koch SC, Del Barrio MG, Dalet A, Gatto G, Günther T, Zhang J, Seidler B, Saur D, Schüle R,  
825 Goulding M (2017) ROR $\beta$  Spinal Interneurons Gate Sensory Transmission during  
826 Locomotion to Secure a Fluid Walking Gait. *Neuron* 96:1419–1431.e5.
- 827 Krubitzer LA, Seelke AMH (2012) Cortical evolution in mammals: the bane and beauty of  
828 phenotypic variability. *Proc Natl Acad Sci USA* 109 Suppl 1:10647–10654.
- 829 Lawrence M, Huber W, Pagès H, Aboyoun P, Carlson M, Gentleman R, Morgan MT, Carey VJ  
830 (2013) Software for computing and annotating genomic ranges. Prlic A, ed. *PLoS Comput*  
831 *Biol* 9:e1003118.
- 832 Lein ES et al. (2007) Genome-wide atlas of gene expression in the adult mouse brain. *Nature*  
833 445:168–176.
- 834 Li H, Crair MC (2011) How do barrels form in somatosensory cortex? *Ann N Y Acad Sci*  
835 1225:119–129.
- 836 Li H, Fertuzinhos S, Mohns E, Hnasko TS, Verhage M, Edwards R, Sestan N, Crair MC (2013)  
837 Laminar and columnar development of barrel cortex relies on thalamocortical  
838 neurotransmission. *Neuron* 79:970–986.



- 839 Li Q, Brown JB, Huang H, Bickel PJ (2011) Measuring reproducibility of high-throughput  
840 experiments. *The Annals of Applied Statistics* 5:1752–1779.
- 841 Liao Y, Smyth GK, Shi W (2014) featureCounts: an efficient general purpose program for  
842 assigning sequence reads to genomic features. *Bioinformatics* 30:923–930.
- 843 Liguz-Lecznar M, Skangiel-Kramska J (2007) Vesicular glutamate transporters VGLUT1 and  
844 VGLUT2 in the developing mouse barrel cortex. *Int J Dev Neurosci* 25:107–114.
- 845 Liu H, Kim S-Y, Fu Y, Wu X, Ng L, Swaroop A, Forrest D (2013) An isoform of retinoid-  
846 related orphan receptor  $\beta$  directs differentiation of retinal amacrine and horizontal  
847 interneurons. *Nat Commun* 4:1813.
- 848 Lush ME, Li Y, Kwon C-H, Chen J, Parada LF (2008) Neurofibromin is required for barrel  
849 formation in the mouse somatosensory cortex. *J Neurosci* 28:1580–1587.
- 850 Matsuda T, Irie T, Katsurabayashi S, Hayashi Y, Nagai T, Hamazaki N, Adefuin AMD, Miura F,  
851 Ito T, Kimura H, Shirahige K, Takeda T, Iwasaki K, Imamura T, Nakashima K (2019)  
852 Pioneer Factor NeuroD1 Rearranges Transcriptional and Epigenetic Profiles to Execute  
853 Microglia-Neuron Conversion. *Neuron* 101:472–485.e477.
- 854 Matsui A, Tran M, Yoshida AC, Kikuchi SS, U M, Ogawa M, Shimogori T (2013) BTBD3  
855 controls dendrite orientation toward active axons in mammalian neocortex. *Science*  
856 342:1114–1118.
- 857 McLeay RC, Bailey TL (2010) Motif Enrichment Analysis: a unified framework and an  
858 evaluation on ChIP data. *BMC Bioinformatics* 11:165.
- 859 Mitsui S, Yamaguchi S, Matsuo T, Ishida Y, Okamura H (2001) Antagonistic role of E4BP4 and  
860 PAR proteins in the circadian oscillatory mechanism. *Genes & Development* 15:995–1006.
- 861 Mountcastle VB (1997) The columnar organization of the neocortex. *Brain* 120 ( Pt 4):701–722.
- 862 Nakagawa Y, O'Leary DDM (2003) Dynamic patterned expression of orphan nuclear receptor  
863 genes RORalpha and RORbeta in developing mouse forebrain. *Dev Neurosci* 25:234–244.
- 864 Oberlaender M, Ramirez A, Bruno RM (2012) Sensory experience restructures thalamocortical  
865 axons during adulthood. *Neuron* 74:648–655.
- 866 Oishi K, Aramaki M, Nakajima K (2016a) Mutually repressive interaction between Brn1/2 and  
867 Rorb contributes to the establishment of neocortical layer 2/3 and layer 4. *Proc Natl Acad*  
868 *Sci USA* 113:3371–3376.
- 869 Oishi K, Nakagawa N, Tachikawa K, Sasaki S, Aramaki M, Hirano S, Yamamoto N, Yoshimura  
870 Y, Nakajima K (2016b) Identity of neocortical layer 4 neurons is specified through correct  
871 positioning into the cortex. *Elife* 5:331.

- 872 Pouchelon G, Gambino F, Bellone C, Telley L, Vitali I, Lüscher C, Holtmaat A, Jabaudon D  
873 (2014) Modality-specific thalamocortical inputs instruct the identity of postsynaptic L4  
874 neurons. *Nature* 511:471–474.
- 875 Quinlan AR, Hall IM (2010) BEDTools: a flexible suite of utilities for comparing genomic  
876 features. *Bioinformatics* 26:841–842.
- 877 Rhoades RW, Chiaia NL, Bennett-Clarke CA, Janas GJ, Fisher CM (1994) Alterations in  
878 brainstem and cortical organization of rats sustaining prenatal vibrissa follicle lesions.  
879 *Somatosens Mot Res* 11:1–17.
- 880 Rice FL (1985) Gradual changes in the structure of the barrels during maturation of the primary  
881 somatosensory cortex in the rat. *J Comp Neurol* 236:496–503.
- 882 Rice FL, Van der Loos H (1977) Development of the barrels and barrel field in the  
883 somatosensory cortex of the mouse. *J Comp Neurol* 171:545–560.
- 884 Ritchie ME, Phipson B, Wu D, Hu Y, Law CW, Shi W, Smyth GK (2015) limma powers  
885 differential expression analyses for RNA-sequencing and microarray studies. *Nucleic Acids*  
886 *Res* 43:e47–e47.
- 887 Ross-Innes CS, Stark R, Teschendorff AE, Holmes KA, Ali HR, Dunning MJ, Brown GD, Gojis  
888 O, Ellis IO, Green AR, Ali S, Chin S-F, Palmieri C, Caldas C, Carroll JS (2012) Differential  
889 oestrogen receptor binding is associated with clinical outcome in breast cancer. *Nature*  
890 481:389–393.
- 891 Rouaux C, Arlotta P (2010) Fezf2 directs the differentiation of corticofugal neurons from striatal  
892 progenitors in vivo. *Nat Neurosci* 13:1345–1347.
- 893 Rouaux C, Arlotta P (2013) Direct lineage reprogramming of post-mitotic callosal neurons into  
894 corticofugal neurons in vivo. *Nat Cell Biol* 15:214–221.
- 895 Salichon N, Gaspar P, Upton AL, Picaud S, Hanoun N, Hamon M, De Maeyer E, Murphy DL,  
896 Mossner R, Lesch KP, Hen R, Seif I (2001) Excessive activation of serotonin (5-HT) 1B  
897 receptors disrupts the formation of sensory maps in monoamine oxidase a and 5-ht  
898 transporter knock-out mice. *J Neurosci* 21:884–896.
- 899 Schindelin J, Arganda-Carreras I, Frise E, Kaynig V, Longair M, Pietzsch T, Preibisch S,  
900 Rueden C, Saalfeld S, Schmid B, Tinevez J-Y, White DJ, Hartenstein V, Eliceiri K,  
901 Tomancak P, Cardona A (2012) Fiji: an open-source platform for biological-image analysis.  
902 *Nat Meth* 9:676–682.
- 903 Schmidt EF, Warner-Schmidt JL, Otopalik BG, Pickett SB, Greengard P, Heintz N (2012)  
904 Identification of the cortical neurons that mediate antidepressant responses. *Cell* 149:1152–  
905 1163.
- 906 Sugino K, Clark E, Schulmann A, Shima Y, Wang L, Hunt DL, Hooks BM, Tränkner D,  
907 Chandrashekar J, Picard S, Lemire AL, Spruston N, Hantman AW, Nelson SB (2019)

- 908 Mapping the transcriptional diversity of genetically and anatomically defined cell  
909 populations in the mouse brain. *Elife* 8:166.
- 910 Svenningsson P, Kim Y, Warner-Schmidt J, Oh Y-S, Greengard P (2013) p11 and its role in  
911 depression and therapeutic responses to antidepressants. *Nat Rev Neurosci* 14:673–680.
- 912 Van der Loos H (1976) Barreloids in mouse somatosensory thalamus. *Neurosci Lett* 2:1–6.
- 913 Van der Loos H, Woolsey TA (1973) Somatosensory cortex: structural alterations following  
914 early injury to sense organs. *Science* 179:395–398.
- 915 Vierbuchen T, Ostermeier A, Pang ZP, Kokubu Y, Südhof TC, Wernig M (2010) Direct  
916 conversion of fibroblasts to functional neurons by defined factors. *Nature* 463:1035–1041.
- 917 Vitalis T, Dauphinot L, Gressens P, Potier M-C, Mariani J, Gaspar P (2017) ROR $\alpha$  Coordinates  
918 Thalamic and Cortical Maturation to Instruct Barrel Cortex Development. *Cereb Cortex*  
919 19:1–14.
- 920 Wang C-F, Hsing H-W, Zhuang Z-H, Wen M-H, Chang W-J, Briz CG, Nieto M, Shyu BC, Chou  
921 S-J (2017) Lhx2 Expression in Postmitotic Cortical Neurons Initiates Assembly of the  
922 Thalamocortical Somatosensory Circuit. *Cell Rep* 18:849–856.
- 923 Wang C-H, Su P-T, Du X-Y, Kuo M-W, Lin C-Y, Yang C-C, Chan H-S, Chang S-J, Kuo C, Seo  
924 K, Leung LL, Chuang Y-J (2010) Thrombospondin type I domain containing 7A (THSD7A)  
925 mediates endothelial cell migration and tube formation. *J Cell Physiol* 222:685–694.
- 926 Wang F, Eagleson KL, Levitt P (2015) Positive regulation of neocortical synapse formation by  
927 the Plexin-D1 receptor. *Brain Res* 1616:157–165.
- 928 Wang Y, Lin X, Gong X, Wu L, Zhang J, Liu W, Li J, Chen L (2018) Atypical GATA  
929 transcription factor TRPS1 represses gene expression by recruiting CHD4/NuRD(MTA2)  
930 and suppresses cell migration and invasion by repressing TP63 expression. *Oncogenesis*  
931 7:96.
- 932 Warner-Schmidt JL, Flajolet M, Maller A, Chen EY, Qi H, Svenningsson P, Greengard P (2009)  
933 Role of p11 in cellular and behavioral effects of 5-HT4 receptor stimulation. *J Neurosci*  
934 29:1937–1946.
- 935 Watson RF, Abdel-Majid RM, Barnett MW, Willis BS, Katsnelson A, Gillingwater TH,  
936 McKnight GS, Kind PC, Neumann PE (2006) Involvement of protein kinase A in patterning  
937 of the mouse somatosensory cortex. *J Neurosci* 26:5393–5401.
- 938 Weirauch MT et al. (2014) Determination and inference of eukaryotic transcription factor  
939 sequence specificity. *Cell* 158:1431–1443.
- 940 Wimmer VC, Broser PJ, Kuner T, Bruno RM (2010) Experience-induced plasticity of  
941 thalamocortical axons in both juveniles and adults. *J Comp Neurol* 518:4629–4648.

- 942 Woolsey TA, Van der Loos H (1970) The structural organization of layer IV in the  
943 somatosensory region (SI) of mouse cerebral cortex. The description of a cortical field  
944 composed of discrete cytoarchitectonic units. *Brain Res* 17:205–242.
- 945 Wu C-S, Ballester Rosado CJ, Lu H-C (2011) What can we get from “barrels”: the rodent barrel  
946 cortex as a model for studying the establishment of neural circuits. *Eur J Neurosci* 34:1663–  
947 1676.
- 948 Yang J-W, Kilb W, Kirischuk S, Unichenko P, Stüttgen MC, Luhmann HJ (2018) Development  
949 of the whisker-to-barrel cortex system. *Curr Opin Neurobiol* 53:29–34.
- 950 Young-Davies CL, Bennett-Clarke CA, Lane RD, Rhoades RW (2000) Selective facilitation of  
951 the serotonin(1B) receptor causes disorganization of thalamic afferents and barrels in  
952 somatosensory cortex of rat. *J Comp Neurol* 425:130–138.
- 953 Zeng H et al. (2012) Large-scale cellular-resolution gene profiling in human neocortex reveals  
954 species-specific molecular signatures. *Cell* 149:483–496.
- 955
